1 **Title:**

2 High-resolution Introgressive Region Map Reveals Spatiotemporal Genome Evolution in  
3 Asian Rice Domestication

4

5 **Authors:**

6 Hajime Ohyanagi, Kosuke Goto, Sónia Negrão, Rod A. Wing, Mark A. Tester, Kenneth L.  
7 McNally, Vladimir B. Bajic, Katsuhiko Mineta, and Takashi Gojobori\*

8

9 **Authors' Affiliations:**

10 *King Abdullah University of Science and Technology (KAUST), Computational Bioscience Research*  
11 *Center (CBRC), Biological and Environmental Sciences & Engineering Division (BESE), Thuwal,*  
12 *23955-6900, Saudi Arabia*

13 Hajime Ohyanagi, Kosuke Goto & Takashi Gojobori

14

15 *School of Biology and Environmental Science, University College Dublin, Belfield, Ireland*

16 Sónia Negrão

17

18 *King Abdullah University of Science and Technology (KAUST), Biological and Environmental Sciences*  
19 *& Engineering Division (BESE), Thuwal, 23955-6900, Saudi Arabia*

20 Rod A. Wing & Mark A. Tester

21

22 *King Abdullah University of Science and Technology (KAUST), Computational Bioscience Research*  
23 *Center (CBRC), Computer, Electrical and Mathematical Sciences & Engineering Division (CEMSE),*  
24 *Thuwal, 23955-6900, Saudi Arabia*

25 Vladimir B. Bajic & Katsuhiko Mineta

26

27 *International Rice Research Institute, Manila, Philippines*

28 Kenneth L. McNally

29

30 **\*Corresponding Author:**

31 Takashi Gojobori, Distinguished Professor,

32 *King Abdullah University of Science and Technology (KAUST), Thuwal 23955-6900, Saudi Arabia*

33 *E-mail: takashi.gojobori@kaust.edu.sa, Phone: +966-12-808-2893*

34

35 **Abstract**

36 **Domestication is anthropogenic evolution that fulfills mankind's critical food**

37 **demand. As such, elucidating the molecular mechanisms behind this process**

38 **promotes the development of future new food resources including crops. With the**  
39 **aim of understanding the long-term domestication process of Asian rice and by**  
40 **employing the *Oryza sativa* subspecies (*indica* and *japonica*) as an Asian rice**  
41 **domestication model, we scrutinized past genomic introgressions between them as**  
42 **traces of domestication. Here we show the genome-wide introgressive region (IR)**  
43 **map of Asian rice, by utilizing 4,587 accession genotypes with a stable outgroup**  
44 **species, particularly at the finest resolution through a machine learning-aided**  
45 **method. The IR map revealed that 14.2% of the rice genome consists of IRs,**  
46 **including both wide IRs (recent) and narrow IRs (ancient). This introgressive**  
47 **landscape with their time calibration indicates that introgression events happened in**  
48 **multiple genomic regions over multiple periods. From the correspondence between**  
49 **our wide IRs and the so-called selective sweep regions, we provide a definitive**  
50 **answer to a long-standing controversy over the evolutionary origin of Asian rice**  
51 **domestication, single or multiple origins: It heavily depends upon which regions you**  
52 **pay attention to, implying that wider genomic regions represent immediate short**  
53 **history of Asian rice domestication as a likely support to the single origin, while its**  
54 **ancient history is interspersed in narrower traces throughout the genome as a**  
55 **possible support to the multiple origin.**

56

## 57 **Introduction**

58 Rice is one of the most essential crops to humankind, playing a critical role in food  
59 security <sup>1</sup>. Since it has been domesticated to fit it to humanity's needs, its genome holds  
60 the secrets to ancient and modern agricultural practices, which can serve as an

61 informative reference for future breeding practices. Rice domestication history can be  
62 divided into three geographically independent ancestral species: *Oryza nivara* (also  
63 known as annual *O. rufipogon* or Or-I) and *O. rufipogon* in Asia that led to domesticated  
64 Asian rice (*O. sativa* L.)<sup>2</sup>, *O. barthii* that was domesticated by early African farmers  
65 around 3,000 years ago and led to domesticated African rice (*O. glaberrima* Steud.)<sup>3</sup>, and  
66 a New World rice domestication process by Amazon farmers around 4,000 years ago that  
67 occurred in South America<sup>4</sup>. In particular, the Asian domesticated rice (*O. sativa*) is the  
68 most prominent species in the genus *Oryza*, which has served as the major staple crop in  
69 most Asian countries for millennia.

70 Among these three domesticated rice species, Asian rice (*O. sativa*) and its origins  
71 have been the most intensively studied and continue to be debated in both archeological  
72 and genetic research areas<sup>5-20</sup>. In short, two conflicting domestication hypotheses have  
73 been proposed: 1) a single domestication process where a single subspecies (either *indica*  
74 or *japonica*) was first domesticated from a wild rice, while the other arose from a  
75 hybridization with another wild rice species; and 2) independent domestication processes  
76 where different species of *O. nivara* and *O. rufipogon* with distinct Asian origins gave  
77 rise to different domesticated subspecies.

78 A comprehensive SNP-based genomic phylogeny (*i.e.*, a genomic phylogeny as a  
79 whole) clearly shows that at least two origins of *O. sativa* subspecies exist<sup>14</sup>, *i.e.*, *O.*  
80 *sativa* ssp. *indica* and *O. nivara* cluster with each other, while *O. sativa* ssp. *japonica* and  
81 *O. rufipogon* make another cluster. However, this is just a subspecies phylogeny, which  
82 does not reflect the domestication history. To trace back the history, plant scientists have  
83 been focusing on their own self-defining genomic entities, *e.g.*, domestication-associated

84 gene regions (with flanking upstream/downstream regions), selective sweep regions  
85 (SSRs)<sup>14</sup>, Co-located Low-Density Genomic Regions (CLDGRs)<sup>10</sup>, transposable  
86 elements<sup>6</sup>, microsatellites<sup>12</sup>, and so forth. In other words, there have been multiple  
87 definitions for domestication-derived regions. Meanwhile, phylogenies inferred by plant  
88 scientists do not always agree with one another, either supporting theories 1) or 2). In fact,  
89 the domesticated Asian rice accessions have supposedly introduced agronomically  
90 advantageous traits from one subspecies to another during the domestication process<sup>7,9,20-</sup>  
91<sup>22</sup>. Therefore, their genomes are presumed to be mosaics since they have been exchanging  
92 alleles over introgression events throughout history. In this sense, the controversy over  
93 the origins of rice domestication arose from the disagreed domestication-derived regions.  
94 Moreover, the phylogenetic analysis of a domestication-associated gene with variable  
95 lengths of upstream/downstream flanking regions in our study, as Choi & Purugganan<sup>8</sup>  
96 also showed that the gene window size profoundly affects the resultant gene phylogenies  
97 (details will be described in **Consequence of Analysis Window Size**). These results  
98 suggest that the window size studied is a critical factor in the controversy.

99       Given that introgression events are representative of human intervention (*i.e.*, the  
100 domestication process), our simple and robust rationale is not to focus on particular  
101 genomic regions, but rather to exhaustively detect any introgressive regions (IRs)  
102 between subspecies as traceable signs of domestication, employing windows with as fine  
103 a resolution as possible. In keeping with this notion, we present not only gene-by-gene  
104 introgressive states but also a genome-wide IR map between *O. sativa* ssp. *indica* and ssp.  
105 *japonica* at the finest resolution using an efficient machine learning model, with the aim  
106 of revealing the long-term domestication process of Asian rice.

107

## 108 **Results**

### 109 **Invention of *Distance Difference (DD)* to Detect Introgressions**

110 To capture the entire introgressive landscape of domesticated Asian rice genomes using a  
111 large-scale genotype set (**Fig. 1a** and **b**), we needed to overcome three major difficulties  
112 described in the **Methods**. In short, i) the low density of rice genotypes, ii) over-diversity  
113 within each subspecies (**Fig. 1c**), and iii) the instability of an outgroup. To overcome  
114 these challenges, we employed 14x coverage genotypes that were supplied by the 3,000  
115 Rice Genomes Project<sup>22-25</sup>. In addition, we introduced a median 10th subset extraction  
116 from the comprehensive dataset, and employed a reproductively isolated accession of *O.*  
117 *punctata* (BB diploid, 2n=24, with African geographical origin)<sup>26</sup> as an outgroup species.  
118 For more details, see **Methods**.

119 Each domesticated subpopulation has its own particular evolutionary rate<sup>27</sup>.  
120 Therefore, each of *indica* and *japonica* subpopulations should show, to some extent,  
121 different genetic distances to an outgroup (a wild rice accession), since they have been  
122 separated from each other for a length of time (**Fig. 2a**) with the assumption that any  
123 inter-subspecies cross (*i.e.*, an introgression) has not occurred. On the other hand, they  
124 will show more similar genetic distances to the outgroup when an inter-subspecies cross  
125 has occurred (**Fig. 2b**). In particular, subspecies in domesticated plants have been  
126 artificially forced to make inter-subspecies crossings in order to introduce agronomically  
127 important traits, thereby particular regions of their genomes must be strongly affected by  
128 the decrease in difference of genetic distance (distance difference).

129 Even though this decrease may disturb an accurate inference of genetic phylogeny of

130 rice subspecies and wild relatives, it can be paradoxically utilized as an index of  
131 introgression, *i.e.*, once a decrease is observed, it is a possible sign of an introgression  
132 event. To distinguish IRs from non-IRs (**Fig. 2a** and **b**), we conceptually defined *DD*  
133 (*Distance Difference*) to the outgroup: A unit is a number of substitutions per nucleotide  
134 site) as:

$$135 \quad DD = |F84(\text{outgroup to } indica) - F84(\text{outgroup to } japonica)|$$

$$136 \quad (*) F84 = \text{Felsenstein84 nucleotide genetic distance}^{28}$$

137 Here, the regions with smaller *DDs* represent IRs, while the regions with larger *DDs*  
138 represent non-IRs. For more details, see **Methods**. Note that because IRs at the very early  
139 stage of domestication will not show enough decrease in *DDs*, IRs of very ancient origin  
140 are out of scope of this method.

141

#### 142 **Incoherent Introgressive States of Domestication-associated Genes (D-genes)**

143 Based on the logic above, we first aimed to determine *DDs* of 25 manually curated  
144 domestication-associated genes (D-genes, **Fig. 2c**) as indices of their introgressive states.  
145 To archive the best accuracy in this limited scale analysis, we constructed 25 gene-by-  
146 gene phylogenetic trees without any flanking upstream/downstream regions, and we  
147 visually inspected their *DDs* thoroughly, to determine whether *indica* and *japonica* show  
148 a similar genetic distance to the outgroup, or different genetic distances to the outgroup.  
149 Our results show that incoherent introgressive states of D-gene regions, *i.e.* nine D-genes  
150 (*Bh4*, *C1*, *GAD1*, *LABA1*, *LGI*, *Progl*, *qSW5*, *Rc*, and *sh4*) out of 25, are introgressive  
151 (regardless of the direction), whereas 14 D-genes (*BADH2*, *Bph14*, *DPL2*, *Ehd1*, *Ghd7*,  
152 *Gn1a*, *GS3*, *GW2*, *Phr1*, *qSH1*, *Rd*, *sd1*, *tb1*, and *waxy*) are not (**Fig. 2c** and **d**, yellow =

153 non-introgressive, red = introgressive, full size phylogenetic tree pictures with detailed  
154 color system are shown in **Supplementary Fig. 1**). *Hd1* and *S5* have status-undetermined.  
155 Through a statistical analysis (**Supplementary Table 2**), we found significant enrichment  
156 in the introgressive proportion of D-genes to that of the control (all genes) by a G-test of  
157 Goodness-of-Fit ( $P$ -value  $< 0.000121$ ). However, the use of this approach with the D-  
158 genes did not yield a coherent introgressive state, thus providing little insight into the  
159 history of Asian rice at the present stage, emphasizing the need for a more systematic  
160 approach to decipher the genome-wide status of Asian rice. For a further interpretation of  
161 these results, see **Discussion**.

162

### 163 **Consequence of Analysis Window Size**

164 Because the introgressive states of D-genes did not give clear answer to the history of  
165 Asian rice, we consequently explored the genome-wide introgressive states in a manner  
166 involving significantly more computational resource costs and time.

167 Our phylogenetic analysis for one of the D-genes (*LGI*) with variable lengths of  
168 flanking upstream/downstream regions (**Fig. 2e** : CDS only, **f** : +5kb-upstream/+5kb-  
169 downstream, **g** : +10kb-upstream/+10kb-downstream, **h** : +20kb-upstream/+20kb-  
170 downstream, and **i** : +100kb-upstream/+100kb-downstream, respectively) clearly shows  
171 that region size heavily affects the resultant phylogeny. More precisely, a narrow region  
172 (CDS only) showed a monophyletic topology of *LGI* between *indica* and *japonica*,  
173 suggesting that it is introgressive (**Fig. 2e**), while wider region analyses resulted in a  
174 polyphyletic relationship resembling non-introgressive state (**Fig. 2g, h, and i**). Full-size  
175 tree pictures with a detailed color system are shown in **Supplementary Fig. 2**. Therefore,

176 we emphasize that window size matters; the window size setup in genome-wide analysis  
177 is significant when we are dealing with phylogenies of domesticated Asian rice at the  
178 loci-level.

179 The genome of domesticated Asian rice is polyphyletic as a whole, yet not always so  
180 at the loci-level<sup>7,9,14,20-22</sup>. This is in line with our inconsistent result (**Fig. 2e, f, g, h, and**  
181 **i**), indicating that a narrower window setup leads to a more accurate inference of  
182 phylogeny at the loci-level. Moreover, adopting a wider window size is inaccurate  
183 because it does not deal with phylogenies at the loci-level<sup>7,9,21,22</sup>, but rather with a whole-  
184 genome phylogeny. Furthermore, our preliminary analyses with imputed 4,587 accession  
185 genotypes unsuccessfully resulted in similar inconsistent phylogenetic relationships,  
186 indicating that methods based on the haplotype linkages in wider regions (*e.g.*, wider  
187 window size; imputation) are not suitable for exploring the phylogenies at the loci-level.

188

### 189 **Genome-wide Introgressive States Occur in Blocks**

190 We developed a machine learning classification model to distinguish the non-  
191 introgressive windows (**Fig. 2a**) from introgressive windows (**Fig. 2b**) computationally.  
192 This is to streamline a time-consuming visual inspection (*e.g.*, if we set 1kb windows all  
193 along the rice genome (~373Mb), we would need to handle ~373,000 windows). Another  
194 merit for adopting a machine learning-aided method is that it is free from null hypotheses  
195 and *P*-value-dependent approach<sup>29</sup>. As shown in **Methods**, we achieved 96.1% accuracy  
196 for the binary classifier by the Breiman & Cutler's Random Forest Algorithm<sup>30</sup>, and thus  
197 we adopted it for further analyses.

198 Initially, we scanned the rice genome and developed an *indica - japonica* IR map at



199 100kb-resolution using a random forest classification model (for details, see **Methods**),  
200 but it was blocky and the introgressive landscape was still veiled, shown in **Fig. 3a**  
201 showing chromosome 1. We then increased the resolution to 20kb- (**Fig. 3b**), 10kb- (**Fig.**  
202 **3c**), 5kb- (**Fig. 3d**), and finally to 1kb (**Fig. 3e**). The 1kb-resolution IR map produced a  
203 sharp image that discriminate introgressive states at the gene loci-level along the entire  
204 genome (IR maps for chromosome 2 to chromosome 12 are shown in **Supplementary**  
205 **Fig. 3**). We identified large amounts of IR bands all along the genome (**Fig. 3e** and  
206 **Supplementary Fig. 3**). Notably, we determined that 14.2% of genomic contents are  
207 introgressive (**Fig. 4a**). In addition, the IRs are not uniformly distributed, but rather  
208 unevenly located in blocks (**Fig. 3e** and **Supplementary Fig. 3**). To be precise, there are  
209 several major wide IRs in each chromosome, while thousands of narrow IRs are scattered  
210 all over the genome (**Fig. 3e** and **Supplementary Fig. 3**), suggesting that there have been  
211 multiple introgressive entities in the genome of domesticated Asian rice.

212

### 213 **Non-uniform Ages of Introgressions**

214 Because we have now established that a substantial amount (14.2%) of the genetic  
215 contents has been exchanged between *indica* and *japonica* subpopulations, we aimed to  
216 uncover what the biased introgressive pattern (**Fig. 3e** and **Supplementary Fig. 3**)  
217 means. By plotting the window proportions of particular *DD*s, we observed apparent non-  
218 uniform *DD* distribution (**Fig. 4b**). We propose that this non-uniform *DD* distribution is  
219 due to multiple classes of IRs, and that wide IRs and narrow IRs have different *DD*  
220 values. To test our proposal, we operationally and precisely defined two IR classes  
221 according to the dimensional continuity of IR windows, with wide IRs ( $\geq 40\text{kb}$ ) and

222 narrow IRs (=1kb), and explored their *DD*s. The genomic positions of the wide IRs are  
223 shown in **Supplementary Table 3**. The results show that wide IRs have a small *DD* of  
224  $5.89 \times 10^{-6}$  substitutions/site, on average for all chromosomes, and narrow IRs have  
225 roughly 100 times larger *DD* than wide IRs ( $5.84 \times 10^{-4}$  substitutions/site). Non-IRs show  
226 a much larger *DD* ( $1.71 \times 10^{-3}$  substitutions/site) (**Fig. 4a** shows the average for all  
227 chromosomes; results for each chromosome are shown in **Supplementary Table 4**). This  
228 similar trend of *DD* can also be observed in the continuous-valued histogram (continuity  
229 of IR windows; from one-IR to 15-IRs) shown in **Supplementary Fig. 4**.

230 When we roughly extrapolate the *indica-japonica* divergence time to 500,000 years  
231 ago<sup>7,26</sup> (**Fig. 5**, non-IRs), we can then estimate that the wide IRs are approximately 1,700  
232 years old, whereas the narrow IRs are approximately 170,000 years old (**Fig. 5**). Hence,  
233 we concluded that the wide IRs are relatively recently formed, while the narrow IRs have  
234 existed for considerably longer time.

235

### 236 **Correspondence between Wide IRs and Selective Sweep Regions**

237 To gain insight into the history of the domestication of Asian rice and to address the  
238 controversy on the origins of this domestication, we compare the genomic locations of  
239 our IRs with those of previously reported domestication-associated genomic entities,  
240 namely; SSRs (selective sweep regions)<sup>14</sup> and CLDGRs (Co-located Low-Density  
241 Genomic Regions)<sup>10</sup>. We re-computed these previously described SSRs and  
242 CLDGRs<sup>10,14</sup> with our 4,587 rice accessions dataset (**Fig. 1a**) onto the Os-Nipponbare-  
243 Reference-IRGSP-1.0 reference genome (see **Methods** for more details), as shown in  
244 parallel with our IRs in **Fig. 3e, f, and g** and **Supplementary Fig. 3** (red lines: SSRs, blue

245 lines: CLDGRs). Interestingly, our results show that the SSRs correspond well with our  
246 IRs, in particular with wide IRs (*i.e.*, young IRs), suggesting that the SSRs capture  
247 recently happened events of introgression. In contrast, however, we observed less  
248 correspondence between the CLDGRs and our wide IRs (**Fig. 3e, f and g** and  
249 **Supplementary Fig. 3**), suggesting that CLDGRs do not deal with such events of  
250 introgression. We discuss evolutionary significance of these patterns of correspondence  
251 further in **Discussion**.

252

## 253 **Discussion**

254 The genetic structure of domesticated Asian rice includes five major subpopulations <sup>31</sup>. A  
255 recently study shows that it can be subdivided into nine detailed subpopulations <sup>22</sup>.  
256 Ancient Chinese literature reported as early as the Han dynasty in China (100 AD) the  
257 existence of two ecogeographical rice groups called ‘*Xian* (or *Hsien*)’ and ‘*Geng* (or  
258 *Keng*)’, which correspond to *indica* and *japonica* subpopulations, respectively <sup>32,33</sup>. This  
259 indicates that *indica* and *japonica* subpopulations have been cultivated for at least around  
260 2000 years, being exposed to human intervention for a long time. For this reason, we  
261 chose these two subspecies as the best model for studying the domestication of Asian rice.  
262 In addition, we considered these subspecies because of the availability of high quality  
263 sequenced genomes <sup>34</sup>, curated genome annotations <sup>35</sup>, more than 3,000 re-sequenced  
264 closely-related accessions <sup>22-25</sup>, and additional quality reference genomes (IR8 for *indica*  
265 and N22 for *aus*), together with eight wild *Oryza* species <sup>26</sup>.

266 Archeological evidence indicates that Asian rice was first domesticated in the early  
267 Holocene period ca. 9000 <sup>5,36</sup>, but Asian rice domestication and its origin is still a matter

268 of ongoing debate in both archeological and genetic research areas <sup>5-20</sup>. Plant scientists  
269 have expected that the availability of whole-genome sequences of domesticated Asian  
270 rice, its wild relatives, and ancient rice <sup>37</sup>, would provide a resolution to this long-  
271 standing debate, yet the controversy is ongoing, because the genetic structure of rice  
272 genomes turned out to be more complex than expected. In the two research studies of  
273 evolutionary origins of domesticated Asian rice <sup>10,14</sup>, they analyzed a single dataset,  
274 which included 1,529 genotypes of wild and domesticated rice <sup>14,38</sup>, leading to opposite  
275 domestication scenarios. More recently, the same dataset was re-evaluated by the third  
276 team, who suggested that rice originated from multiple populations of *O. rufipogon*  
277 (and/or *O. nivara*): *De novo* domestication only occurred once where domestication  
278 alleles were introgressed predominantly from *japonica* into *indica* subpopulations <sup>7,8</sup>.

279 In this study, we explore possible events of introgression between subspecies,  
280 considering them as traceable signs of domestication (**Fig. 2a** and **b**). We capture the  
281 genome-wide IR map between *O. sativa* ssp. *indica* and *japonica*, with the aim of  
282 encapsulating the long-term history of Asian rice domestication. We exhaustively scan  
283 and reveal the genome-wide introgressive landscape between *indica* and *japonica* at the  
284 finest resolution using a machine learning classification model (**Fig. 3e** and  
285 **Supplementary Fig. 3**). Our results show that a substantially large proportion of the rice  
286 genome (14.2%) consists of wide and narrow traces of introgression between *indica* and  
287 *japonica* (**Fig. 4a**). This suggests that even after the initial diversification of Asian rice  
288 roughly 500,000 years ago <sup>7,26</sup>, *indica* and *japonica* subpopulations have been exchanging  
289 alleles between each other.

290 In addition, we explore the introgressive state of 25 D-gene regions. We detected a

291 significantly large number of D-genes upon IRs, though not all of D-genes  
292 (**Supplementary Table 2**), which shows that introgression was a major but non-exclusive  
293 molecular mechanism for D-gene propagation. In other words, some D-genes moved  
294 along the introgressive flows (regardless of the direction). Note that not all D-genes were  
295 mobilized via introgression events.

296 We also observed that, in terms of *DD*, the wide IRs have emerged recently, whereas  
297 the narrow IRs have existed for a much longer time (**Fig. 4a** and **Supplementary Table**  
298 **4**). This mosaic introgressive landscape in terms of time (**Fig. 5**) clearly indicates that  
299 multiple introgression events between subpopulations have taken place multiple times  
300 throughout history (**Fig. 6**). In each of these events, the brand-new wide IRs would  
301 comprise some beneficial alleles and many non-beneficial alleles. The beneficial alleles  
302 would have been selected for and fixed in recipient subpopulations, while the non-  
303 beneficial alleles would not have been fixed in the subpopulation. Thus, the genomic  
304 regions with less advantageous alleles would have been replaced, eventually disappearing  
305 following subsequent multiple backcrosses within the recipient subpopulation (**Fig. 6**).  
306 Such genome dynamics can look like “sequentially built sandcastles” on a beach,  
307 whereby newly built castles are still intact, while the older castles are already beginning  
308 to crumble due to continuously coming waves toward the beach (**Fig. 6**). From the  
309 standpoint of our Sandcastles Model, the vast majority of detected IRs correspond to non-  
310 beneficial alleles, which are mostly derived by hitchhiking effects (**Fig. 6**), reasonably  
311 explaining the substantially large proportion of IRs in the genome (14.2%). Extrapolating  
312 the *indica-japonica* divergence time (500,000 years ago corresponds to  $1.71 \times 10^{-3}$   
313 substitutions/site in terms of *DD*)<sup>7,26</sup>, we can estimate that the narrow and wide IRs are

314 approximately 170,000 and 1,700 years old, respectively (**Fig. 5**). This is consistent with  
315 the Asian rice domestication timeline: It was initially domesticated in the early Holocene  
316 period<sup>5,36</sup> and has been maintained for at least about 2,000 years<sup>32,33</sup>.

317 The history, particularly the first origins of Asian rice domestication has long been a  
318 subject of active discussion in plant biology<sup>5-20</sup>. Studies have focused specifically on the  
319 domestication-associated regions that presumably reflect the domestication process in  
320 rice genomes. Those regions are typically defined by D-gene loci with flanking  
321 upstream/downstream regions, SSRs, and CLDGRs. As an inevitable consequence in  
322 those studies<sup>10,14</sup>, the definition of domestication-associated regions heavily affected the  
323 reconstructed genetic phylogenies and the conclusions.

324 In this study, by employing highly dense SNP information and a machine learning  
325 modeling approach, we elucidated a 1kb-resolution IR map and found that the young IRs  
326 were well co-localized with SSRs<sup>14</sup>, but not with CLDGRs<sup>10</sup>. In terms of population  
327 genetics, each of the IRs and SSRs were derived from a different population statistic, *i.e.*,  
328 IRs were detected by a decrease in genetic distance difference to the wild relative (*DD*),  
329 while SSRs were inferred by a decrease in nucleotide diversity ( $\Pi$ ) compared to that of  
330 the wild relatives. However, since gene introgressions will act in the direction of  
331 decreasing  $\Pi$  in the domesticated population,  $\Pi(\text{wild}) / \Pi(\text{domesticated})$  will have a  
332 higher value, and thus the correspondence between SSRs and young IRs makes sense. In  
333 terms of molecular phylogeny, the young IRs show a quite higher genetic identity  
334 between *indica* and *japonica*, which could lead to monophyly (**Fig. 5**, bottom right panel).  
335 On the other hand, the old IRs and non-IRs tend to represent more genetic divergence,  
336 which seems to be polyphyletic (**Fig. 5**, bottom left panel and top panel). Hence the

337 discrepancy in results from the two previous studies<sup>10,11,14,15</sup> can be reasonably explained  
338 by our Sandcastles Model (**Fig. 6**), *i.e.*, one study focused on the new castles (young IRs)  
339<sup>14</sup>, while the other did not<sup>10</sup>.

340 We also propose that focusing on wider genomic regions (*e.g.*, SSRs and CLDGRs)  
341 is a misleading way to understand the primal origins of domesticated life, because these  
342 regions contain recently built young IR blocks (**Fig. 6**). The ancient history of interest to  
343 scientists is rather interspersed in narrower traces throughout the genome. We need to  
344 eliminate carefully the SSR-like entities that overlap with the young IR blocks from the  
345 analysis, because they are recent and do not reflect ancient domestication history. We  
346 should instead probe into old IRs in the genome, which are the true traces of ancient  
347 domestication history. In that sense, our IR map clarifies every local history of each  
348 genomics region.

349 In summary, we have determined that a substantially large proportion (14.2%) of  
350 genetic contents has been exchanged between *indica* and *japonica* subpopulations. We  
351 have also demonstrated that introgression events have happened in multiple genomic  
352 regions over multiple periods throughout the history of domesticated Asian rice, revealing  
353 the complex spatiotemporal genome dynamics in Asian rice domestication.  
354 Concomitantly, we settle the major controversy in plant science between two hypotheses  
355<sup>5-20</sup> using our Sandcastles Model, *i.e.*, each study was focusing on a different genomic  
356 region of a different era. Especially, we anticipate that wider genomic regions are just  
357 representing immediate short history of Asian rice domestication, while its ancient history  
358 is interspersed in narrower traces throughout the genome. Therefore, our 1kb-resolution  
359 IR map serves as a chart to explore the long-term history in Asian rice domestication. We

360 expect that systematic phylogenetic approaches in loci-level with comprehensive wild  
361 rice genotypes will reveal more precise history in Asian rice domestication.

362

### 363 **Methods summary**

364 The genotypes of domesticated and wild rice accessions were all retrieved from publicly  
365 available databases. The full methods and any associated information are available in the  
366 online version of the paper.

367

### 368 **Methods**

369 **Reference genome.** For the reference genome sequences and reference genome  
370 annotations, the reference Nipponbare genome Os-Nipponbare-Reference-IRGSP-1.0 (*O.*  
371 *sativa* ssp. *japonica* cv. Nipponbare)<sup>39</sup>; hereinafter referred to as Nipponbare RefSeq  
372 and CGSNL annotations served in RAP-DB<sup>40</sup> were employed, respectively.

373 **Domestication-associated genes (D-genes).** Based on our literature survey, we manually  
374 selected and curated a total of 25 D-genes (**Fig. 2c**) for this study. The selection criteria  
375 were based on agronomically beneficial effects of genes selected.

376 **Issues on rice genotypes.** In particular, we focused our analyses on two *O. sativa*  
377 subspecies, ssp. *indica* and ssp. *japonica*, as an Asian rice domestication model. Despite  
378 multiple studies conducted to explore the history of Asian rice introgression and  
379 domestication with large-scale accessions datasets including *indica* and *japonica*<sup>8-</sup>  
380 <sup>10,14,21,22</sup>, their genome-wide scanning procedures have been performed using relatively  
381 large window size setups (5kb -100kb). The importance of window size in such analyses  
382 are outlined in this study (**Fig. 2e, f, g, h, and i**) and also in Choi & Purugganan<sup>8</sup>, but due



383 to the low SNPs density (56.4% missing data rate) in the dataset<sup>14,38</sup>, the issue of  
384 window size had not yet been overcome. Another problem is that each *indica* and  
385 *japonica* subpopulation contains a significant amount of genetic diversity<sup>14,22,31</sup>, or  
386 rather, some subspecies accessions can be intermediate accessions between the two  
387 subspecies since these subpopulations are not yet completely reproductively isolated from  
388 each other<sup>41</sup>. In fact, both *indica* and *japonica* subpopulations show a certain degree of  
389 phenotypic diversity, including some intermediate traits (**Fig. 1c**). Consequently, when  
390 taking all the *indica* and *japonica* accessions into account, the conclusion may be  
391 ambiguous because of the intermediate states of genetic distance. The final issue to be  
392 overcome when we trace back the domestication history of Asian rice is to choose which  
393 species to use as an outgroup. It is widely believed that *O. nivara* and *O. rufipogon* are  
394 the immediate ancestors of ssp. *indica* and ssp. *japonica*, respectively<sup>2</sup>. However, those  
395 wild rice species are still able to intermate with *O. sativa*<sup>42</sup>; thus, the genetic distance  
396 between those wild rice species and *O. sativa* could be underestimated in introgressive  
397 regions. Hence, those wild rice species are not always suitable for outgroup species in  
398 phylogenetic analysis. Our preliminary gene-by-gene phylogenetic analyses with the  
399 3,000 Rice Genomes Project<sup>22-25</sup>, higher coverage wilds<sup>26,38,43,44</sup> and the *O. punctata*<sup>26</sup>  
400 datasets (**Fig. 1a**, in total 3,060 accessions) aimed to assess the suitability of *O. nivara*,  
401 *O. rufipogon*, *O. glaberrima*, *O. barthii*, *O. glumaepatula* and *O. punctata* as outgroup  
402 species for this study (**Supplementary Fig. 5**). Our analyses showed that in some cases  
403 (e.g. *Gn1a*, *LGI*, *Phr1*, and *qSH1*) (**Supplementary Fig. 5i, n, o and q**), a close-relatives  
404 (*O. rufipogon* or *O. nivara*) can serve as an outgroup species. However, in most cases,  
405 they are not suitable for an outgroup since they are not genetically isolated from

406 domesticated rice (**Supplementary Fig. 5**).

407 **Solutions on rice genotype issues.** To develop an accurate high-resolution (up to 1kb  
408 window width) map of Asian rice introgression in a reasonable manner, we needed to  
409 address the above-mentioned three problems: i) the low density of rice genotypes, ii)  
410 over-diversity within each subspecies, and iii) the instability of outgroup. With the aim of  
411 achieving good quality and quantity of rice genotypes, we collected imputation-free ~14x  
412 coverage genotypes of 3,024 rice cultivars (**Fig. 1a**) from the 3,000 Rice Genomes  
413 Project<sup>22-25</sup>, in conjunction with other publicly available genotypes (**Fig. 1a**). We  
414 appropriately converted their genomic coordinates to that of the Nipponbare RefSeq as  
415 described<sup>38</sup> when needed. We performed genomic imputation with the Beagle program<sup>45</sup>  
416 in two batches (wild/domesticated) separately and exclusively on the 4,553 accessions  
417 only for the purpose of SSRs and CLDGRs re-computation (**Fig. 1a**), but not on any  
418 other accession datasets. The core dataset (**Fig. 1a**, 3,025 accessions) contained 1,712  
419 *indica* and 833 *japonica* accessions with a missing genotype rate of 15.0% on average.  
420 Then, to overcome the effect of intra-subspecies divergence, we dynamically picked up  
421 median 10th accessions from *indica* and *japonica* window by window (see **Introgressive**  
422 **Regions (IRs) detection**). Finally, to adopt an appropriate outgroup species in our study,  
423 based on preliminary gene-by-gene phylogenetic analyses (**Supplementary Fig. 5**), we  
424 exclusively employed the *O. punctata* (IRGC105690, BB diploid, 2n=24, geographical  
425 origin: Africa)<sup>26</sup> only, with the assumption that it has been mostly reproductively isolated  
426 from *O. sativa* populations. We can ignore the underestimate effect of nucleotide distance  
427 due to possible introgression events between *O. sativa* and *O. punctata* (**Supplementary**  
428 **Fig. 5**).

429 **Mapping and SNPs calling.** We first quality inspected all short reads by FastQC  
430 (<http://www.bioinformatics.babraham.ac.uk/projects/fastqc/>), and then we filtered out  
431 and/or trimmed out adaptor sequences and low-quality bases using Trimmomatic<sup>46</sup>. After  
432 those preprocessing steps, we mapped the remaining reads onto the Nipponbare RefSeq  
433 using ‘bwa mem’ commands in BWA<sup>47</sup> with default parameters, except for the proper  
434 insert size limitation (-w 500 or -w 800, dictated by the data source). Repeat  
435 sequences scattered within the Nipponbare RefSeq were not masked in our mapping  
436 process. Next, we called variants using the GATK<sup>48</sup> with a conventional best practice  
437 method (<https://software.broadinstitute.org/gatk/best-practices/>).

438 **Phylogenetic tree construction.** For window-base analysis, we generated each 1,000bp  
439 multiple alignment. For gene-by-gene analysis, we generated a multiple alignment of  
440 actual CDS for each gene (including intron regions, but not including any flanking  
441 upstream/downstream regions). All nucleotide genetic distances between domesticated  
442 rice windows/genes and outgroup windows/genes were estimated by PHYLIP-dnadist  
443 command with default parameters (Felsenstein84 distance)<sup>28</sup>. We reconstructed all  
444 phylogenetic trees using the PHYLIP-neighbor command with default parameters  
445 (Neighbor-Joining method)<sup>28,49</sup>. Trees were drawn by FigTree software GUI  
446 (<http://tree.bio.ed.ac.uk/software/figtree/>), rooted by *O. punctata* as the fixed outgroup.

447 **Invention of Distance Difference (DD).** Under isolated conditions, each of *indica* and  
448 *japonica* subpopulations should show different genetic distances to an outgroup (a wild  
449 rice accession) to some extent, since they have been separated for a length of time in each  
450 subpopulation (**Fig. 2a**). However, they will show unexpectedly similar genetic distance  
451 to an outgroup when an inter-subspecies cross (*i.e.* introgression) has occurred recently

452 **(Fig. 2b)**. Together with incomplete lineage sorting and other possible situations<sup>50,51</sup>, this  
453 is one of the reasons why a particular gene phylogeny does not always agree with the  
454 (sub)species phylogeny. Here we conceptually define *DD* (genetic *Distance Difference* to  
455 the outgroup) as;

$$456 \quad DD = |F84(\text{outgroup to } indica) - F84(\text{outgroup to } japonica)| .$$

457 <sup>(\*)</sup> F84 = Felsenstein84 nucleotide genetic distance<sup>28</sup>

458 Here, smaller *DDs* represent IRs, while larger *DDs* mean that those are non-IRs. Note  
459 that IRs happened in the initial period of domestication will not show enough decrease in  
460 *DD*, hence such IRs are out of scope of this method. In terms of population genetics, we  
461 have multiple *indica* accessions and multiple *japonica* accessions, and each  
462 subpopulation includes much genetic diversity (see **Issues on rice genotypes**). To  
463 overcome the undesirable effect on intra-subspecies over-diversity in terms of nucleotide  
464 distance to the outgroup, we dynamically chose the median 10th accessions from *indica*  
465 (172 accessions) window by window (or gene by gene), and median 10th accessions from  
466 *japonica* (84 accessions) window by window (or gene by gene), respectively. They are  
467 representative subpopulations in each window (or each gene) in the sense that the most  
468 mediocre members reflect the profile of population. Therefore, the actual *DD* value is not  
469 computed by a single *indica* accession and a single *japonica* accession. Instead, it is  
470 computed by the average form of median 10th accessions of *indica*, and by the average  
471 form of median 10th accessions of *japonica*. Hence, the actual formula for *DD* is;

$$472 \quad DD = \left| \frac{\sum_{indica}^{median10th} F84(\text{outgroup to } indica)}{172} - \frac{\sum_{japonica}^{median10th} F84(\text{outgroup to } japonica)}{84} \right| .$$

473 <sup>(\*)</sup> F84 = Felsenstein84 nucleotide genetic distance<sup>28</sup>

474 **Introgressive Regions (IRs) detection.** For the gene-by-gene analysis, we conducted

475 visual phylogeny inspection (**Fig. 2** and **Supplementary Fig. 1**). For the window-based  
476 analysis, although visual inspection of each window phylogeny would give the best  
477 accuracy, it is too time consuming. We thus aimed to computationally distinguish the  
478 non-introgressive windows (**Fig. 2a**) from the introgressive windows (**Fig. 2b**) by the use  
479 of a binary classifier through Breiman & Cutler's Random Forest Algorithm<sup>30</sup>. The  
480 accuracy of the binary classifier was 96.1%, as determined by a 10-fold cross validation  
481 (for more details, see **Optimization of machine learning models**). The 1kb resolution  
482 machine learning classification result showed that 14.2% of the rice genome was  
483 introgressive, and 50.0% was non-introgressive (was excluded 35.8% from the analysis  
484 and marked as status-undetermined, for reasons outlined below) (**Fig. 4a**). In the  
485 window-based analysis, we excluded windows that have less alignable length with the  
486 outgroup (<5% of the window region, *i.e.* <50bp in the case of the 1kb window setup).  
487 We also excluded windows with no genetic difference (*i.e.*, no SNP) from any of the  
488 *indica/japonica* accessions to the outgroup at all. Those windows are shown as gray  
489 windows (**Fig. 3** and **Supplementary Fig. 3**).

490 **Training of machine learning models.** For the training dataset of machine learning  
491 classification models, we firstly conducted visual phylogeny inspection for randomly  
492 chosen 640 1kb-windows (~0.267% of total phylogeny determined windows, see **Fig.**  
493 **4a**), and we identified 114 windows as IRs and 526 windows as non-IRs. We then  
494 balanced the ratio between positive cases (IRs) and negative cases (non-IRs) in 114 IRs  
495 and randomly sub-sampled 114 non-IRs, respectively, and these 228 cases were finally  
496 used as the actual training dataset for generating the classification models.

497 **Optimization of machine learning models.** For the features used to develop the

498 classification models, we extracted the nucleotide distance matrices for median 10th 257  
499 accessions (172 *indica*, 84 *japonica*, and 1 outgroup). Since the  $257^2 = 66,049$  variables  
500 were too computationally demanding, we reduced the variables by equal subsampling to  
501 50 accessions, retaining the original variations in each subspecies (50 *indica*, 50  
502 *japonica*, and 1 outgroup). Finally, we adopted  $101^2 = 10,201$  variables as the features  
503 for developing the classification models. In order to find the best option for our machine  
504 learning analysis, then we conducted a grid search for model parameters with a support  
505 vector machine model (with non-linear Gaussian kernel) (with parameters  $C = 2, 4, 8, 16,$   
506  $32, 64, 128, 256, 512, 1024$ ;  $\sigma = 2, 4, 8, 16, 32, 64, 128, 256, 512, 1024$ ; 100 cases in  
507 total), and a random forest model (with parameters  $n\text{tree} = 16, 32, 64, 128, 256, 512,$   
508  $1024, 2048, 4096, 8192$ ;  $m\text{try} = 2, 4, 8, 16, 32, 64, 128, 256, 512, 1024$ ; 100 cases in  
509 total). We determined that the random forest model ( $n\text{tree} = 512, m\text{try} = 256, \text{accuracy} =$   
510  $96.1\%$  by 10-fold cross validation, data not shown) was the best option. We implemented  
511 the support vector machine model, random forest model, and cross validation framework  
512 by R language and R packages (kernlab, randomForest, and mlr) ([https://www.r-](https://www.r-project.org)  
513 [project.org](https://www.r-project.org)).

514 **Verification of the machine learning model.** To verify the effectiveness of our random  
515 forest classifier, we drew an identical conclusion by adopting another statistical  
516 classification method as shown below. Assuming that the median 10th subset data are not  
517 normally distributed, we tested whether the difference between F84 (outgroup to *indica*)  
518 and F84 (outgroup to *japonica*) is statistically significant or not, using the non-parametric  
519 statistical test method (Mann-Whitney  $U$  test,  $P\text{-value} < 10^{-7}$ ), window by window. When  
520 the null hypothesis is rejected, the window will be non-introgressive (**Fig. 2a,**

521 significantly different). Otherwise (*i.e.*, not significantly different), it is considered a  
522 candidate for introgression (**Fig. 2b**). As noted above, although the *P*-value threshold is  
523 quite conservative ( $P$ -value  $< 10^{-7}$ ), 54.8% of the rice genome (similarly to random forest  
524 model at 50.0%) was still determined as significant (*i.e.*, non-introgressive). We  
525 determined that genomic locations were introgressive similarly to the random forest  
526 model (data not shown), and our conclusion was identical to that of the random forest  
527 model. Even if we adopted a more aggressive *P*-value  $< 0.05$ , the significant (*i.e.*, non-  
528 introgressive) window percentages were still quite similar (56.4%), the genomic locations  
529 as introgressive were still similar to those of the random forest model (data not shown)  
530 and again we reached identical conclusions, thus demonstrating the robustness of our  
531 random forest model. Moreover, manual phylogeny curation of 25 gene-by-gene results  
532 was well in line with the window-based results of random forest (**Fig. 3** and  
533 **Supplementary Fig. 3**), reconfirming the accuracy of our random forest model.

534 **Enrichment test for D-genes on IRs.** We tested whether the 25 D-genes (**Fig. 2c**) are  
535 statistically significantly enriched (or depleted) on IRs or not. A G-test of Goodness-of-  
536 Fit showed statistically significant enrichment on the proportion of introgressive D-genes  
537 (9 genes) against non-introgressive D-genes (14 genes) (**Supplementary Table 2**) (2 D-  
538 genes (*Hdl* and *S5*) showed undetermined phylogeny). For the control (all genes, *i.e.*,  
539 expected proportion), we computationally determined each gene's IRs concordance when  
540 the entire gene locus was inclusively contained in any continuous IRs of 1kb resolution  
541 (introgressive = 3,498 genes: 9.24%; non-introgressive = 34,350 genes: 90.8%). The G-  
542 test was conducted with the following R script:

```
543 > observed      = c(9, 14)  
544 > expected.prop = c(0.0924, 0.908)  
545 > degrees = 1
```

```
546 > expected.count = sum(observed)*expected.prop
547 > G = 2 * sum(observed * log(observed / expected.count))
548 > G
549 [1] 14.78253
550 > pchisq(G,df=degrees,lower.tail=FALSE)
551 [1] 0.0001206482
552 > q()
```

#### 554 **Re-computation of Selective Sweep Regions (SSRs) and Co-located Low-Density**

555 **Genomic Regions (CLDGRs).** For the already reported domestication-associated  
556 genomic entities (Selective Sweep Regions (SSRs)<sup>14</sup> and Co-located Low-Density  
557 Genomic Regions (CLDGRs)<sup>10</sup>), we re-computed their SSRs and CLDGRs using our  
558 4,587 accessions dataset (**Fig. 1a**) on the Nipponbare RefSeq, and we conducted  
559 independent permutation tests to determine the appropriate  $\Pi(\text{wild}) / \Pi(\text{domesticated})$   
560 threshold. In **Fig. 3e** and **Supplementary Fig. 3**, re-computed SSRs and CLDGRs were  
561 shown as red lines and blue lines, respectively. The re-computation procedures are  
562 summarized in **Supplementary Fig. 6** and **7**.

563 **Data availability.** All the intermediate and final analysis results in this study are  
564 available from the corresponding author upon request.

565

#### 566 **D-genes' References (will be imported to Fig. 2c):**

*BADH2*<sup>52</sup>

*Bh4*<sup>53</sup>

*Bph14*<sup>54</sup>

*C1*<sup>55</sup>

*DPL2*<sup>56</sup>

*Ehd1*<sup>57</sup>

*GAD1*<sup>58</sup>

*Ghd7*<sup>59</sup>

*Gn1a*<sup>60</sup>

*GS3*<sup>61</sup>

*GW2*<sup>62</sup>



*Hd1*<sup>63</sup>  
*LABA1*<sup>64</sup>  
*LG1*<sup>65</sup>  
*Phr1*<sup>66</sup>  
*Prog1*<sup>67</sup>  
*qSH1*<sup>68</sup>  
*qSW5*<sup>69</sup>  
*Rc*<sup>70</sup>  
*Rd*<sup>71</sup>  
*S5*<sup>72</sup>  
*sd1*<sup>73</sup>  
*sh4*<sup>74</sup>  
*tb1*<sup>75</sup>  
*waxy*<sup>76</sup>

567

568 **References:**

- 569 1. FAO. FAO Statistical Yearbook Part3 : Feeding the world. (2013).  
570 2. Kumagai, M., Tanaka, T., Ohyanagi, H., Hsing, Y.C. & Itoh, T. Genome Sequence of Oryza  
571 Species. in *Rice Genomics, Genetics and Breeding* (eds. Sasaki, T. & Ashikari, M.) 1-20  
572 (Springer, 2018).  
573 3. Wang, M. *et al.* The genome sequence of African rice (*Oryza glaberrima*) and evidence  
574 for independent domestication. *Nat Genet* **46**, 982-8 (2014).  
575 4. Hilbert, L. *et al.* Evidence for mid-Holocene rice domestication in the Americas. *Nat Ecol*  
576 *Evol* **1**, 1693-1698 (2017).  
577 5. Callaway, E. Domestication: The birth of rice. *Nature* **514**, S58-9 (2014).  
578 6. Carpentier, M.C. *et al.* Retrotranspositional landscape of Asian rice revealed by 3000  
579 genomes. *Nat Commun* **10**, 24 (2019).  
580 7. Choi, J.Y. *et al.* The Rice Paradox: Multiple Origins but Single Domestication in Asian  
581 Rice. *Mol Biol Evol* **34**, 969-979 (2017).  
582 8. Choi, J.Y. & Purugganan, M.D. Multiple Origin but Single Domestication Led to *Oryza*  
583 *sativa*. *G3 (Bethesda)* **8**, 797-803 (2018).  
584 9. Civan, P. & Brown, T.A. Role of genetic introgression during the evolution of cultivated  
585 rice (*Oryza sativa* L.). *BMC Evol Biol* **18**, 57 (2018).  
586 10. Civan, P., Craig, H., Cox, C.J. & Brown, T.A. Three geographically separate domestications  
587 of Asian rice. *Nat Plants* **1**, 15164 (2015).  
588 11. Civan, P., Craig, H., Cox, C.J. & Brown, T.A. Multiple domestications of Asian rice. *Nat*  
589 *Plants* **2**, 16037 (2016).  
590 12. Gao, L.Z. & Innan, H. Nonindependent domestication of the two rice subspecies, *Oryza*  
591 *sativa* ssp. *indica* and ssp. *japonica*, demonstrated by multilocus microsatellites.  
592 *Genetics* **179**, 965-76 (2008).  
593 13. Gross, B.L. & Zhao, Z.J. Archaeological and genetic insights into the origins of  
594 domesticated rice. *Proceedings of the National Academy of Sciences of the United States*  
595 *of America* **111**, 6190-6197 (2014).

- 596 14. Huang, X. *et al.* A map of rice genome variation reveals the origin of cultivated rice.  
597 *Nature* **490**, 497-501 (2012).
- 598 15. Huang, X.H. & Han, B. Rice domestication occurred through single origin and multiple  
599 introgressions. *Nature Plants* **2**(2016).
- 600 16. Londo, J.P., Chiang, Y.C., Hung, K.H., Chiang, T.Y. & Schaal, B.A. Phylogeography of Asian  
601 wild rice, *Oryza rufipogon*, reveals multiple independent domestications of cultivated  
602 rice, *Oryza sativa*. *Proc Natl Acad Sci U S A* **103**, 9578-83 (2006).
- 603 17. Molina, J. *et al.* Molecular evidence for a single evolutionary origin of domesticated rice.  
604 *Proc Natl Acad Sci U S A* **108**, 8351-6 (2011).
- 605 18. Sang, T. & Ge, S. Genetics and phylogenetics of rice domestication. *Curr Opin Genet Dev*  
606 **17**, 533-8 (2007).
- 607 19. Vitte, C., Ishii, T., Lamy, F., Brar, D. & Panaud, O. Genomic paleontology provides  
608 evidence for two distinct origins of Asian rice (*Oryza sativa* L.). *Mol Genet Genomics* **272**,  
609 504-11 (2004).
- 610 20. Yang, C.C. *et al.* Independent domestication of Asian rice followed by gene flow from  
611 japonica to indica. *Mol Biol Evol* **29**, 1471-9 (2012).
- 612 21. Santos, J.D. *et al.* Fine scale genomic signals of admixture and alien introgression among  
613 Asian rice landraces. *Genome Biol Evol* (2019).
- 614 22. Wang, W. *et al.* Genomic variation in 3,010 diverse accessions of Asian cultivated rice.  
615 *Nature* **557**, 43-49 (2018).
- 616 23. Alexandrov, N. *et al.* SNP-Seek database of SNPs derived from 3000 rice genomes.  
617 *Nucleic Acids Res* **43**, D1023-7 (2015).
- 618 24. Li, J.Y., Wang, J. & Zeigler, R.S. The 3,000 rice genomes project: new opportunities and  
619 challenges for future rice research. *Gigascience* **3**, 8 (2014).
- 620 25. Mansueto, L. *et al.* Rice SNP-seek database update: new SNPs, indels, and queries.  
621 *Nucleic Acids Res* **45**, D1075-D1081 (2017).
- 622 26. Stein, J.C. *et al.* Genomes of 13 domesticated and wild rice relatives highlight genetic  
623 conservation, turnover and innovation across the genus *Oryza*. *Nat Genet* **50**, 285-296  
624 (2018).
- 625 27. Sun, X., Jia, Q., Guo, Y., Zheng, X. & Liang, K. Whole-genome analysis revealed the  
626 positively selected genes during the differentiation of indica and temperate japonica  
627 rice. *PLoS One* **10**, e0119239 (2015).
- 628 28. Felsenstein, J. PHYLIP - Phylogeny Inference Package (Version 3.2). *Cladistics* **5**, 164-6  
629 (1989).
- 630 29. Johnson, D.H. The insignificance of statistical significance testing. *Journal of Wildlife*  
631 *Management* **63**, 763-772 (1999).
- 632 30. Breiman, L. Random forests. *Machine Learning* **45**, 5-32 (2001).
- 633 31. Garris, A.J., Tai, T.H., Coburn, J., Kresovich, S. & McCouch, S. Genetic structure and  
634 diversity in *Oryza sativa* L. *Genetics* **169**, 1631-8 (2005).
- 635 32. Oka, H.I. *Origin of Cultivated Rice*, (Elsevier Science, Tokyo, 1988).
- 636 33. Ting, Y. Chronological studies of the cultivation and the distribution of rice varieties,  
637 Keng and Sen. *Sun Yatsen University Agronomy Bulletin* **6**, 1-32 (1949).
- 638 34. International Rice Genome Sequencing, P. The map-based sequence of the rice genome.  
639 *Nature* **436**, 793-800 (2005).
- 640 35. Ohyanagi, H. *et al.* The Rice Annotation Project Database (RAP-DB): hub for *Oryza sativa*  
641 ssp. japonica genome information. *Nucleic Acids Res* **34**, D741-4 (2006).

- 642 36. Zuo, X.X. *et al.* Dating rice remains through phytolith carbon-14 study reveals  
643 domestication at the beginning of the Holocene. *Proceedings of the National Academy*  
644 *of Sciences of the United States of America* **114**, 6486-6491 (2017).
- 645 37. Kumagai, M. *et al.* Rice Varieties in Archaic East Asia: Reduction of Its Diversity from Past  
646 to Present Times. *Mol Biol Evol* **33**, 2496-505 (2016).
- 647 38. Ohyanagi, H. *et al.* OryzaGenome: Genome Diversity Database of Wild Oryza Species.  
648 *Plant Cell Physiol* **57**, e1 (2016).
- 649 39. Kawahara, Y. *et al.* Improvement of the Oryza sativa Nipponbare reference genome  
650 using next generation sequence and optical map data. *Rice (N Y)* **6**, 4 (2013).
- 651 40. Sakai, H. *et al.* Rice Annotation Project Database (RAP-DB): an integrative and interactive  
652 database for rice genomics. *Plant Cell Physiol* **54**, e6 (2013).
- 653 41. Guo, J. *et al.* Overcoming inter-subspecific hybrid sterility in rice by developing indica-  
654 compatible japonica lines. *Sci Rep* **6**, 26878 (2016).
- 655 42. Wang, H.R., Vieira, F.G., Crawford, J.E., Chu, C.C. & Nielsen, R. Asian wild rice is a hybrid  
656 swarm with extensive gene flow and feralization from domesticated rice. *Genome*  
657 *Research* **27**, 1029-1038 (2017).
- 658 43. Xu, X. *et al.* Resequencing 50 accessions of cultivated and wild rice yields markers for  
659 identifying agronomically important genes. *Nat Biotechnol* **30**, 105-11 (2011).
- 660 44. Zhao, Q. *et al.* Pan-genome analysis highlights the extent of genomic variation in  
661 cultivated and wild rice. *Nat Genet* **50**, 278-284 (2018).
- 662 45. Browning, S.R. & Browning, B.L. Rapid and accurate haplotype phasing and missing-data  
663 inference for whole-genome association studies by use of localized haplotype clustering.  
664 *American Journal of Human Genetics* **81**, 1084-1097 (2007).
- 665 46. Bolger, A.M., Lohse, M. & Usadel, B. Trimmomatic: a flexible trimmer for Illumina  
666 sequence data. *Bioinformatics* **30**, 2114-20 (2014).
- 667 47. Li, H. & Durbin, R. Fast and accurate short read alignment with Burrows-Wheeler  
668 transform. *Bioinformatics* **25**, 1754-60 (2009).
- 669 48. McKenna, A. *et al.* The Genome Analysis Toolkit: a MapReduce framework for analyzing  
670 next-generation DNA sequencing data. *Genome Res* **20**, 1297-303 (2010).
- 671 49. Saitou, N. & Nei, M. The neighbor-joining method: a new method for reconstructing  
672 phylogenetic trees. *Mol Biol Evol* **4**, 406-25 (1987).
- 673 50. Pamilo, P. & Nei, M. Relationships between Gene Trees and Species Trees. *Molecular*  
674 *Biology and Evolution* **5**, 568-583 (1988).
- 675 51. Yang, C.C., Sakai, H., Numa, H. & Itoh, T. Gene tree discordance of wild and cultivated  
676 Asian rice deciphered by genome-wide sequence comparison. *Gene* **477**, 53-60 (2011).
- 677 52. Kovach, M.J., Calingacion, M.N., Fitzgerald, M.A. & McCouch, S.R. The origin and  
678 evolution of fragrance in rice (*Oryza sativa* L.). *Proc Natl Acad Sci U S A* **106**, 14444-9  
679 (2009).
- 680 53. Zhu, B.F. *et al.* Genetic control of a transition from black to straw-white seed hull in rice  
681 domestication. *Plant Physiol* **155**, 1301-11 (2011).
- 682 54. Du, B. *et al.* Identification and characterization of Bph14, a gene conferring resistance to  
683 brown planthopper in rice. *Proc Natl Acad Sci U S A* **106**, 22163-8 (2009).
- 684 55. Saitoh, K., Onishi, K., Mikami, I., Thidar, K. & Sano, Y. Allelic diversification at the C  
685 (*Osc1*) locus of wild and cultivated rice: Nucleotide changes associated with  
686 phenotypes. *Genetics* **168**, 997-1007 (2004).
- 687 56. Mizuta, Y., Harushima, Y. & Kurata, N. Rice pollen hybrid incompatibility caused by  
688 reciprocal gene loss of duplicated genes. *Proc Natl Acad Sci U S A* **107**, 20417-22 (2010).

- 689 57. Doi, K. *et al.* Ehd1, a B-type response regulator in rice, confers short-day promotion of  
690 flowering and controls FT-like gene expression independently of Hd1. *Genes Dev* **18**,  
691 926-36 (2004).
- 692 58. Jin, J. *et al.* GAD1 Encodes a Secreted Peptide That Regulates Grain Number, Grain  
693 Length, and Awn Development in Rice Domestication. *Plant Cell* **28**, 2453-2463 (2016).
- 694 59. Xue, W.Y. *et al.* Natural variation in Ghd7 is an important regulator of heading date and  
695 yield potential in rice. *Nature Genetics* **40**, 761-767 (2008).
- 696 60. Ashikari, M. *et al.* Cytokinin oxidase regulates rice grain production. *Science* **309**, 741-5  
697 (2005).
- 698 61. Fan, C. *et al.* GS3, a major QTL for grain length and weight and minor QTL for grain width  
699 and thickness in rice, encodes a putative transmembrane protein. *Theor Appl Genet* **112**,  
700 1164-71 (2006).
- 701 62. Song, X.J., Huang, W., Shi, M., Zhu, M.Z. & Lin, H.X. A QTL for rice grain width and weight  
702 encodes a previously unknown RING-type E3 ubiquitin ligase. *Nat Genet* **39**, 623-30  
703 (2007).
- 704 63. Yano, M. *et al.* Hd1, a major photoperiod sensitivity quantitative trait locus in rice, is  
705 closely related to the arabidopsis flowering time gene CONSTANS. *Plant Cell* **12**, 2473-  
706 2483 (2000).
- 707 64. Hua, L. *et al.* LABA1, a Domestication Gene Associated with Long, Barbed Awns in Wild  
708 Rice. *Plant Cell* **27**, 1875-1888 (2015).
- 709 65. Zhu, Z.F. *et al.* Genetic control of inflorescence architecture during rice domestication.  
710 *Nature Communications* **4**(2013).
- 711 66. Yu, Y.C. *et al.* Independent Losses of Function in a Polyphenol Oxidase in Rice:  
712 Differentiation in Grain Discoloration between Subspecies and the Role of Positive  
713 Selection under Domestication. *Plant Cell* **20**, 2946-2959 (2008).
- 714 67. Tan, L. *et al.* Control of a key transition from prostrate to erect growth in rice  
715 domestication. *Nat Genet* **40**, 1360-4 (2008).
- 716 68. Konishi, S. *et al.* An SNP caused loss of seed shattering during rice domestication.  
717 *Science* **312**, 1392-6 (2006).
- 718 69. Shomura, A. *et al.* Deletion in a gene associated with grain size increased yields during  
719 rice domestication. *Nat Genet* **40**, 1023-8 (2008).
- 720 70. Sweeney, M.T., Thomson, M.J., Pfeil, B.E. & McCouch, S. Caught red-handed: Rc encodes  
721 a basic helix-loop-helix protein conditioning red pericarp in rice. *Plant Cell* **18**, 283-94  
722 (2006).
- 723 71. Furukawa, T. *et al.* The Rc and Rd genes are involved in proanthocyanidin synthesis in  
724 rice pericarp. *Plant J* **49**, 91-102 (2007).
- 725 72. Du, H., Ouyang, Y., Zhang, C. & Zhang, Q. Complex evolution of S5, a major reproductive  
726 barrier regulator, in the cultivated rice *Oryza sativa* and its wild relatives. *New Phytol*  
727 **191**, 275-87 (2011).
- 728 73. Asano, K. *et al.* Artificial selection for a green revolution gene during japonica rice  
729 domestication. *Proc Natl Acad Sci U S A* **108**, 11034-9 (2011).
- 730 74. Li, C., Zhou, A. & Sang, T. Rice domestication by reducing shattering. *Science* **311**, 1936-9  
731 (2006).
- 732 75. Takeda, T. *et al.* The OsTB1 gene negatively regulates lateral branching in rice. *Plant J* **33**,  
733 513-20 (2003).
- 734 76. Olsen, K.M. *et al.* Selection under domestication: Evidence for a sweep in the rice Waxy  
735 genomic region. *Genetics* **173**, 975-983 (2006).

736

737 **Acknowledgements**

738 The research reported in this publication was supported through funding from King  
739 Abdullah University of Science and Technology (KAUST), under award numbers  
740 BAS/1/1059-01-01 (to T.G.), BAS/1/1606-01-01 (to V.B.B.), FCC/1/1976-03-01 (to T.G.)  
741 and FCC/1/1976-20-01 (to T.G.).

742

743 **Author contributions**

744 H.O. designed the study, performed the bioinformatics and statistical analysis, and wrote  
745 the manuscript. K.G. performed the bioinformatics analysis. S.N. wrote the manuscript  
746 and contributed to insightful discussions. R.A.W., M.A.T., K.M. and V.B.B. edited the  
747 manuscript and contributed to insightful discussions. K.L.M. provided easy access to the  
748 genotypes and phenotypes of 3,000 Rice Genomes Project and contributed to insightful  
749 discussions. T.G. designed the study and wrote the manuscript. All the authors discussed  
750 the results and commented on the manuscript.

751

752 **Competing interests**

753 The authors declare no competing interests.

754

755 **Corresponding author**

756 Correspondence to Takashi Gojobori: [takashi.gojobori@kaust.edu.sa](mailto:takashi.gojobori@kaust.edu.sa)

757

758 **Figure Legends**

759 **Fig. 1.** Passport data of domesticated and wild Asian rice accessions in this study (**a**, in  
760 total 4,587 accessions. for more details in higher coverage wilds, see **Supplementary**  
761 **Table 1**), and geographical origin of accessions in 3,000 Rice Genomes Project (**b**, 3,024  
762 accessions). A typical phenotypic diversity within subspecies (**c**, grain length over grain  
763 width in *O. sativa* ssp. *indica* (n=1269, green) and *japonica* (n=533, blue)).

764 **Fig. 2.** Schematic view of underestimate on genetic *Distance Difference* (**a** and **b**), and  
765 phylogenetic analysis of manually curated D-genes (25 genes) and their determined  
766 introgressive states (**c** and **d**). Under isolated conditions, each of *indica* and *japonica*  
767 subpopulation shall show different genetic distance to the outgroup (a wild rice  
768 accession) to some extent, since they have been isolated from each other for a length of  
769 time (**a**), whereas they will show unexpectedly similar genetic distance to the outgroup  
770 when they made an inter-subspecies crossing (*i.e.* introgression) recently (**b**). Manually  
771 curated D-genes (25 genes) and their determined introgressive state (**c**). Reconstructed  
772 phylogenetic trees of 25 D-genes (**d**), green nodes : *indica*, blue nodes : *japonica*. Non-  
773 introgressive genes were shown in yellow background. Introgressive genes were shown  
774 in red background. Genes of undetermined phylogeny were shown in gray background.  
775 Phylogenetic trees for one of the D-genes (*LGI*) with variable length of flanking  
776 upstream/downstream regions (**e** : CDS only, **f** : +5kb-upstream/+5kb-downstream, **g** :  
777 +10kb-upstream/+10kb-downstream, **h** : +20kb-upstream/+20kb-downstream, and **i** :  
778 +100kb-upstream/+100kb-downstream, respectively). Full size tree pictures with detailed  
779 color system are shown in **Supplementary Fig. 1** and **Supplementary Fig. 2**.

780 **Fig. 3.** 100kb- (**a**), 20kb- (**b**), 10kb- (**c**), 5kb- (**d**), and 1kb-resolution (**e**) IR maps  
781 (showing chromosome 1 only). The chromosome coordinate was shown in bp on the left

782 side of horizontal chromosomal rectangles, lined in every 2,500,000 bp. Introgressive  
783 windows were shown in red. Non-introgressive windows were shown in yellow.  
784 Windows of undetermined phylogeny were shown in gray. Each green rectangle stands  
785 for a D-gene region. The 1kb-resolution windows (e) were shown in parallel with SSRs  
786 (red lines) and CDRGs (blue lines). Magnified views for two regions in chr01 (f) and  
787 chr04 (g) were exemplified as well.

788 **Fig. 4.** Numerical distribution of *DD* (*Distance Difference*). The *DD* statistics according  
789 to dimensional continuity of all 1kb windows (a, average of all 12 chromosomes) and the  
790 window proportion histogram of particular *DD*s (b, x-axis : *DD* in logarithmic scale, y-  
791 axis : frequency of windows). *DD* is defined as below:

$$792 \quad DD = | F84 (\text{outgroup to } indica) - F84 (\text{outgroup to } japonica) |$$

793 <sup>(\*)</sup> F84 = Felsenstein 84 nucleotide genetic distance

794 For more details of the formula, see **Methods**.

795 **Fig. 5.** Conceptual diagram of estimated introgression ages. The magnitudes of *DD*s  
796 (*Distance Differences*, red scales) were overdrawn.

797 **Fig. 6.** The Sandcastles Model in domestication, a case scenario with three independent  
798 introgression events. Each \* (asterisk) stands for an agronomically beneficial allele.

799

**a**

|                                                         | 3000 Rice Genomes Project                                                                                | RiceHap3                        | OryzaGenome                         | Rice3000+RiceHap3+OryzaGenome       | Higher coverage wilds (AA)                                                       | <i>Oryza punctata</i> (BB, diploid)            | Grand Total                         |
|---------------------------------------------------------|----------------------------------------------------------------------------------------------------------|---------------------------------|-------------------------------------|-------------------------------------|----------------------------------------------------------------------------------|------------------------------------------------|-------------------------------------|
| reference                                               | The 3000 rice genomes project 2014<br>Alexandrov et al. 2015<br>Mansueto et al. 2017<br>Wang et al. 2018 | Huang et al. 2012               | Ohyanagi et al. 2016                | (This study)                        | Xu et al., 2012<br>Ohyanagi et al. 2016<br>Zhao et al. 2018<br>Stein et al. 2018 | Stein et al. 2018                              |                                     |
| reference genome                                        | Os-Nipponbare-Reference-IRGSP-1.0                                                                        | IRGSP-build4.0                  | Os-Nipponbare-Reference-IRGSP-1.0   | Os-Nipponbare-Reference-IRGSP-1.0   | Os-Nipponbare-Reference-IRGSP-1.0 (This study)                                   | Os-Nipponbare-Reference-IRGSP-1.0 (This study) |                                     |
| # of accessions cultivated                              | 3,024                                                                                                    | 3,024                           | 1,529                               | 446                                 | 4,553                                                                            | 35                                             | 4,587                               |
| B#                                                      | 246 (3KRice 2014 TableS1B)                                                                               | -                               | -                                   | -                                   | 246 (3KRice 2014 TableS1B)                                                       | -                                              | -                                   |
| CX#                                                     | 312 (3KRice 2014 TableS1B)                                                                               | -                               | -                                   | -                                   | 312 (3KRice 2014 TableS1B)                                                       | -                                              | -                                   |
| IRIS_313-#                                              | 2466 (3KRice 2014 TableS1A)                                                                              | -                               | -                                   | -                                   | 2466 (3KRice 2014 TableS1A)                                                      | -                                              | -                                   |
| HP#                                                     | -                                                                                                        | 621 (Huang et al. 2012 TableS7) | -                                   | -                                   | 621 (Huang et al. 2012 TableS7)                                                  | -                                              | -                                   |
| GP#                                                     | -                                                                                                        | 462 (Huang et al. 2012 TableS7) | -                                   | -                                   | 462 (Huang et al. 2012 TableS7)                                                  | -                                              | -                                   |
| close-wild ( <i>nivara</i> & <i>rufipogon</i> )         | -                                                                                                        | 446 (Huang et al. 2012 TableS2) | 446 (Ohyanagi et al. 2016 sup.data) | 446 (Ohyanagi et al. 2016 sup.data) | -                                                                                | 32                                             | -                                   |
| distant-wild                                            | -                                                                                                        | -                               | -                                   | -                                   | -                                                                                | 3                                              | 1                                   |
| Coverage (against Nipponbare)                           | High (14x in average)                                                                                    | Low (1x or 2x)                  | Low (2x)                            | High + Low (imputed)                | High (12x each, at least)                                                        | High (140x)                                    |                                     |
| Is employed in preliminary outgroup assessment?         | Yes                                                                                                      | No                              | No                                  | (No)                                | Yes                                                                              | Yes                                            | 3,060 (Outgroup assessment)         |
| Is employed in main analysis (introgression detection)? | Yes                                                                                                      | No                              | No                                  | (No)                                | No                                                                               | Yes                                            | 3,025 (Main analysis)               |
| Is employed in SSRs & CLDGRs recomputation?             | (Yes)                                                                                                    | (Yes)                           | (Yes)                               | Yes                                 | No                                                                               | No                                             | 4,553 (SSRs & CLDGRs recomputation) |

bioRxiv preprint doi: <https://doi.org/10.1101/829168>; this version posted August 16, 2020. The copyright holder for this preprint (which was not certified by peer review) is the author/funder. All rights reserved. No reuse allowed without permission.

**b**

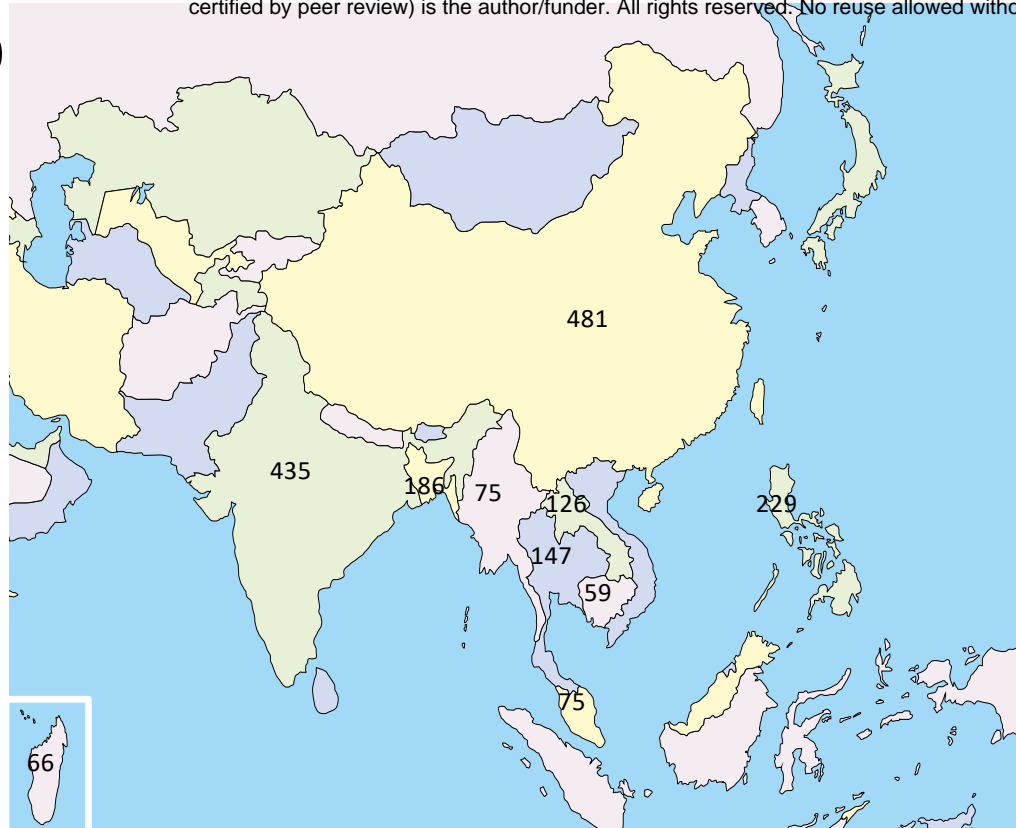

| Origin of country | Number of accessions |
|-------------------|----------------------|
| China             | 481                  |
| India             | 435                  |
| Philippines       | 229                  |
| Bangladesh        | 186                  |
| Thailand          | 147                  |
| Laos              | 126                  |
| Myanmar           | 75                   |
| Malaysia          | 75                   |
| Madagascar        | 66                   |
| Cambodia          | 59                   |
| (Other countries) | 374                  |
| (Origin unknown)  | 771                  |

(In total 89 countries)

**c**

Frequency

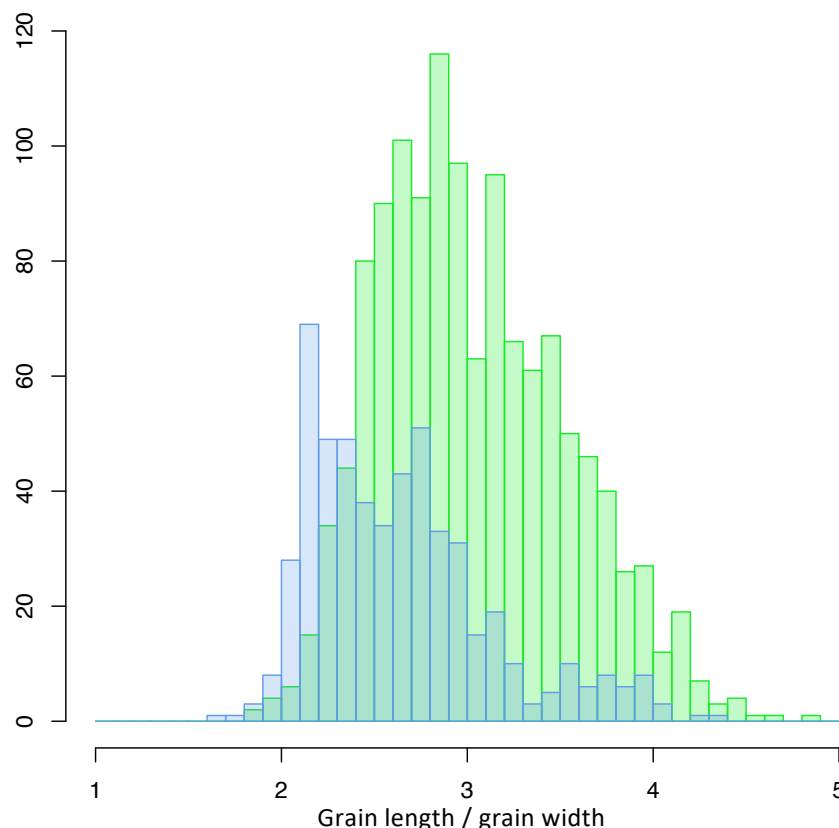

The shortest grains

KHAW KAR 13::IRGC 36711-1  
(*japonica*, 6.3 / 3.8 = 1.66)

MUTTU SAMBA::IRGC 36333-1  
(*indica*, 5.7 / 3.0 = 1.90)

The longest grains

FORTUNA COLORADO::IRGC 703-1  
(*japonica*, 10.4 / 2.4 = 4.33)

MAVOLATSIKA::IRGC 83137-1  
(*indica*, 9.7 / 2.0 = 4.85)

**Fig. 1.** Passport data of domesticated and wild Asian rice accessions in this study (**a**, in total 4,587 accessions. for more details in higher coverage wilds, see **Supplementary Table 1**), and geographical origin of accessions in 3,000 Rice Genomes Project (**b**, 3,024 accessions). A typical phenotypic diversity within subspecies (**c**, grain length over grain width in *O. sativa* ssp. *indica* (n=1269, green) and *japonica* (n=533, blue)) .



### a Non-Introgressive

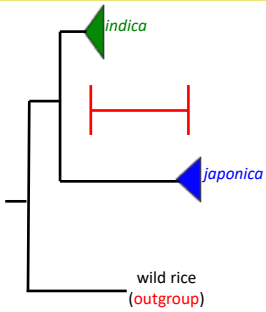

### b Introgressive

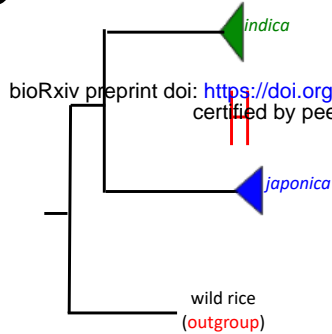

| GeneSymbol   | Description                              | Reference | LocusID      | Location                            | Introgressive state (by visual inspection) |
|--------------|------------------------------------------|-----------|--------------|-------------------------------------|--------------------------------------------|
| <i>BADH2</i> | Fragrance                                | 52        | Os08g0424500 | chr08:20379823..20385975 (+ strand) | Non-introgressive                          |
| <i>Bh4</i>   | Change hull color                        | 53        | Os04g0460200 | chr04:22969845..22971859 (+ strand) | Introgressive                              |
| <i>Bph14</i> | Brown planthopper resistance             | 54        | Os03g0848700 | chr03:35693286..35699010 (- strand) | Non-introgressive                          |
| <i>C1</i>    | Leaf sheath color and apiculus color     | 55        | Os06g0205100 | chr06:5315163..5316640 (+ strand)   | Introgressive                              |
| <i>DPL2</i>  | Hybrid incompatibility                   | 56        | Os06g0184100 | chr06:4201250..4202851 (- strand)   | Non-introgressive                          |
| <i>Ehd1</i>  | Early heading date                       | 57        | Os10g0463400 | chr10:17076098..17081344 (- strand) | Non-introgressive                          |
| <i>GAD1</i>  | Grain number, length and awn development | 58        | Os08g0485500 | chr08:23998787..24000176 (+ strand) | Introgressive                              |
| <i>Ghd7</i>  | Heading date and yield potential         | 59        | Os07g0261200 | chr07:9152377..9155030 (- strand)   | Non-introgressive                          |
| <i>Gn1a</i>  | Grain number                             | 60        | Os01g0197700 | chr01:5270449..5275585 (- strand)   | Non-introgressive                          |
| <i>GS3</i>   | Increase grain length                    | 61        | Os03g0407400 | chr03:16729501..16735109 (- strand) | Non-introgressive                          |
| <i>GW2</i>   | Grain width and weight                   | 62        | Os02g0244100 | chr02:8115223..8121651 (+ strand)   | Non-introgressive                          |
| <i>Hd1</i>   | Heading date                             | 63        | Os06g0275000 | chr06:9336376..9338569 (+ strand)   | (undetermined)                             |
| <i>LABA1</i> | Long and barned awns                     | 64        | Os04g0518800 | chr04:25959399..25963504 (+ strand) | Introgressive                              |
| <i>LG1</i>   | Inflorescence architecture               | 65        | Os04g0656500 | chr04:33488722..33492700 (+ strand) | Introgressive                              |
| <i>Phr1</i>  | Change hull color                        | 66        | Os03g0329900 | chr03:12126320..12131242 (+ strand) | Non-introgressive                          |
| <i>Prog1</i> | Tiller erectness                         | 67        | Os07g0153600 | chr07:2839194..2840089 (- strand)   | Introgressive                              |
| <i>qSH1</i>  | Seed shattering                          | 68        | Os01g0848400 | chr01:36445456..36449951 (- strand) | Non-introgressive                          |
| <i>qSW5</i>  | Increase grain width                     | 68        | Os05g0187500 | chr05:5365122..5366701 (+ strand)   | Introgressive                              |
| <i>Rc</i>    | Change pericarp color                    | 70        | Os07g0211500 | chr07:6062889..6069304 (+ strand)   | Introgressive                              |
| <i>Rd</i>    | Change pericarp color                    | 71        | Os01g0633500 | chr01:25382714..25384678 (+ strand) | Non-introgressive                          |
| <i>S5</i>    | Hybrid sterility                         | 72        | Os06g0213100 | chr06:5759685..5761518 (+ strand)   | (undetermined)                             |
| <i>sd1</i>   | Reduce tiller length                     | 73        | Os01g0883800 | chr01:38382385..38385469 (+ strand) | Non-introgressive                          |
| <i>sh4</i>   | Seed shattering                          | 74        | Os04g0670900 | chr04:34231186..34233221 (- strand) | Introgressive                              |
| <i>tb1</i>   | Teosinte branched                        | 75        | Os03g0706500 | chr03:28428504..28430438 (+ strand) | Non-introgressive                          |
| <i>waxy</i>  | Amylose content                          | 76        | Os06g0133000 | chr06:1765622..1770653 (+ strand)   | Non-introgressive                          |

### d

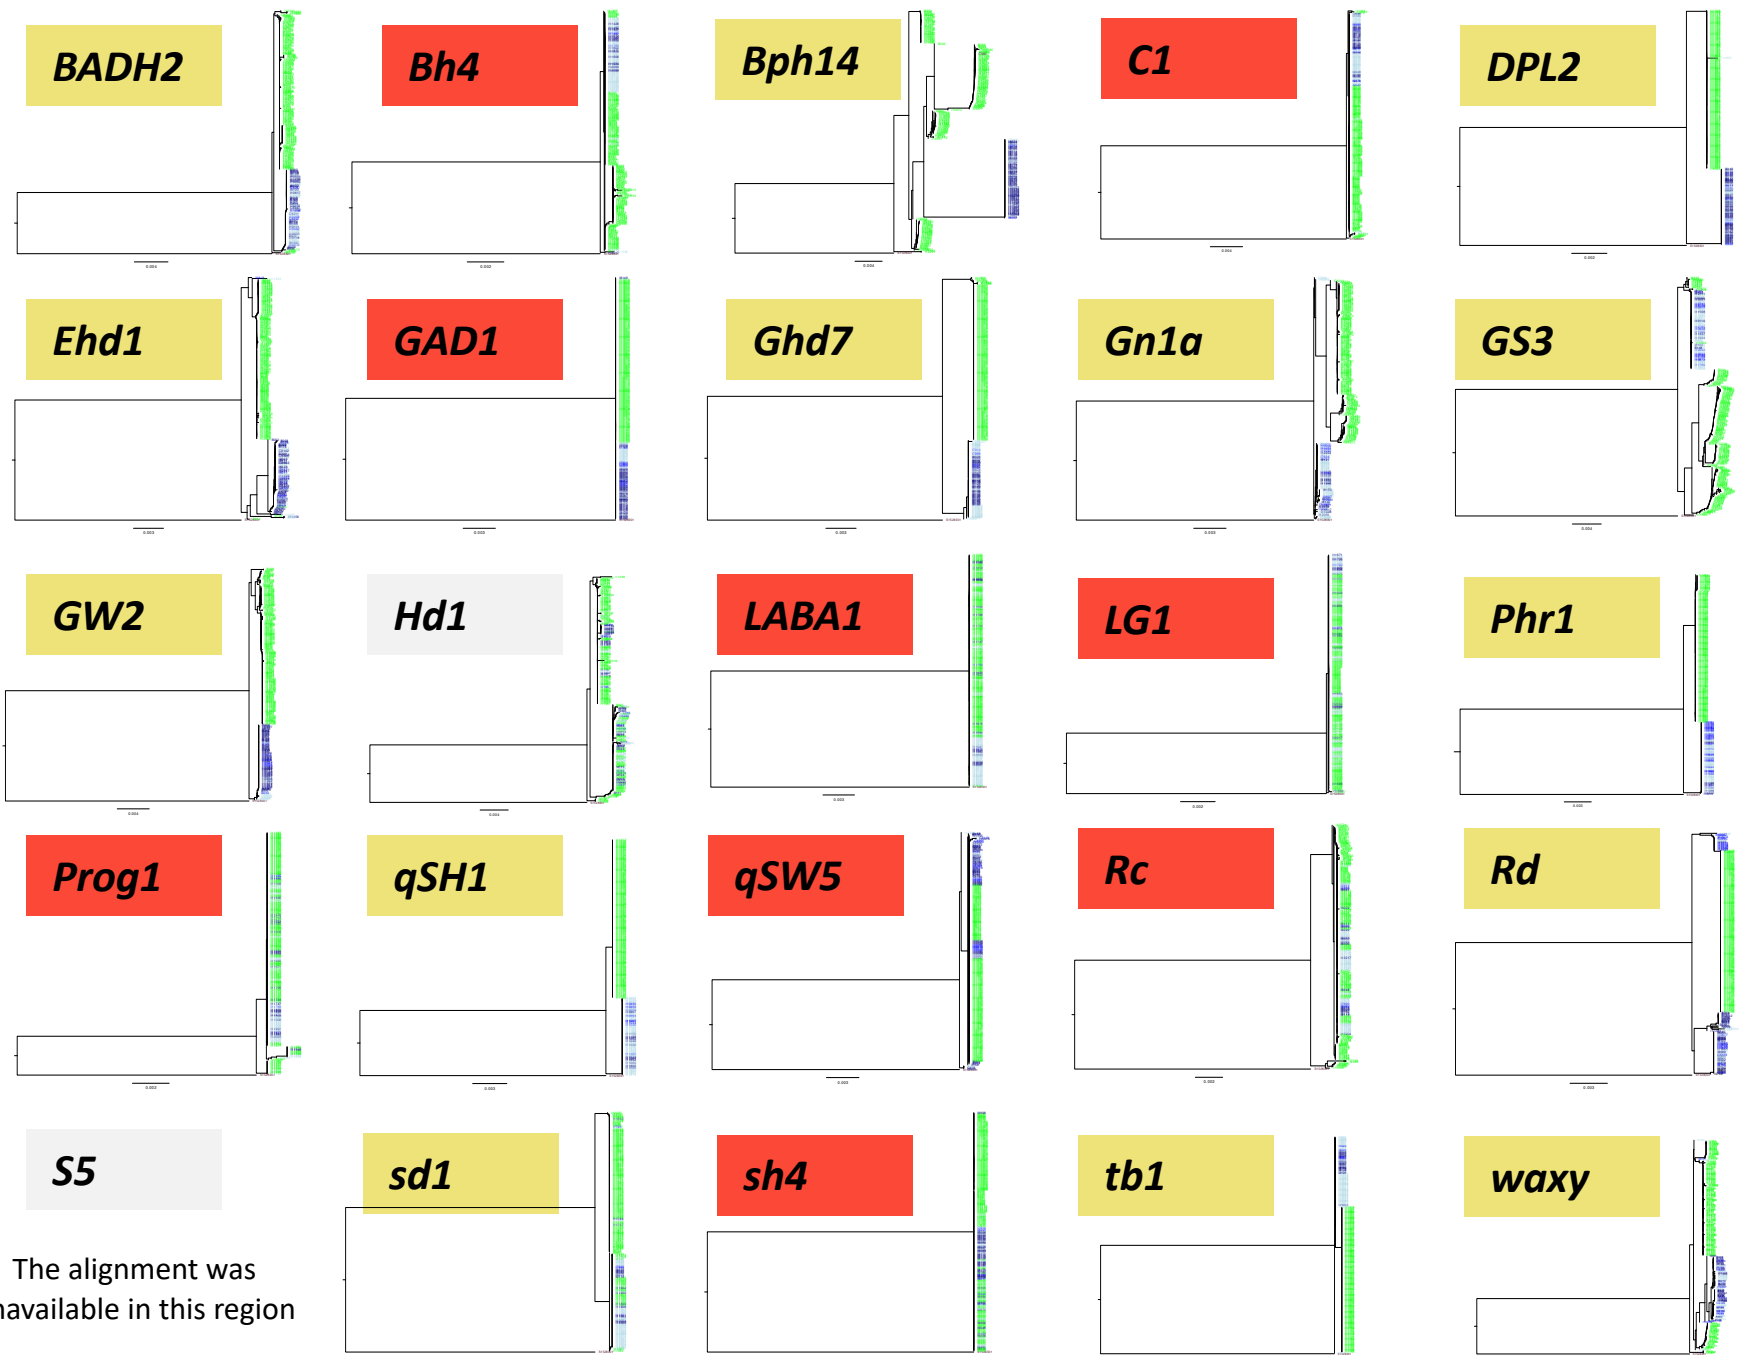

### e

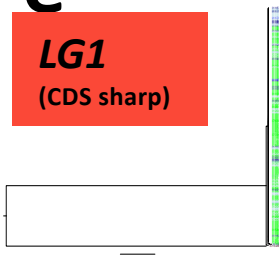

### f

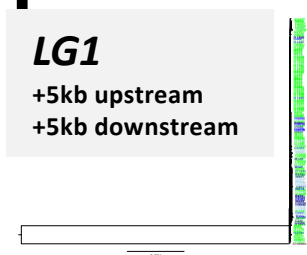

### g

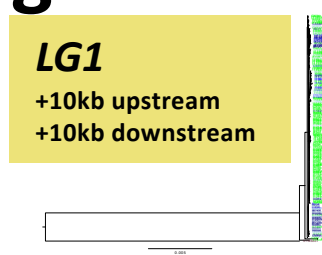

### h

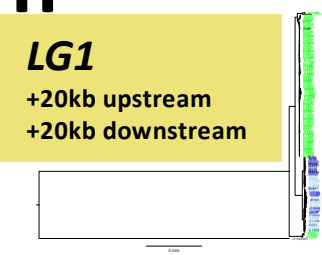

### i

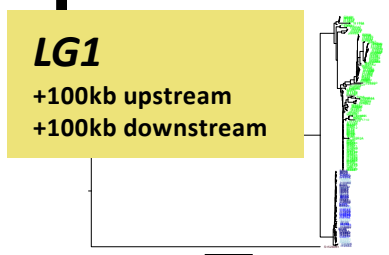

**Fig. 2.** Schematic view of underestimate on genetic *Distance Difference* (**a** and **b**), and phylogenetic analysis of manually curated D-genes (25 genes) and their determined introgressive states (**c** and **d**). Under isolated conditions, each of *indica* and *japonica* subpopulation shall show different genetic distance to the outgroup (a wild rice accession) to some extent, since they have been isolated from each other for a length of time (**a**), whereas they will show unexpectedly similar genetic distance to the outgroup when they made an inter-subspecies crossing (*i.e.* introgression) recently (**b**). Manually curated D-genes (25 genes) and their determined introgressive state (**c**). Reconstructed phylogenetic trees of 25 D-genes (**d**), green nodes : *indica*, blue nodes : *japonica*. Non-introgressive genes were shown in yellow background. Introgressive genes were shown in red background. Genes of undetermined phylogeny were shown in gray background. Phylogenetic trees for one of the D-genes (*LG1*) with variable length of flanking upstream/downstream regions (**e** : CDS only, **f** : +5kb-upstream/+5kb-downstream, **g** : +10kb-upstream/+10kb-downstream, **h** : +20kb-upstream/+20kb-downstream, and **i** : +100kb-upstream/+100kb-downstream, respectively). Full size tree pictures with detailed color system are shown in **Supplementary Fig. 1** and **Supplementary Fig. 2**.

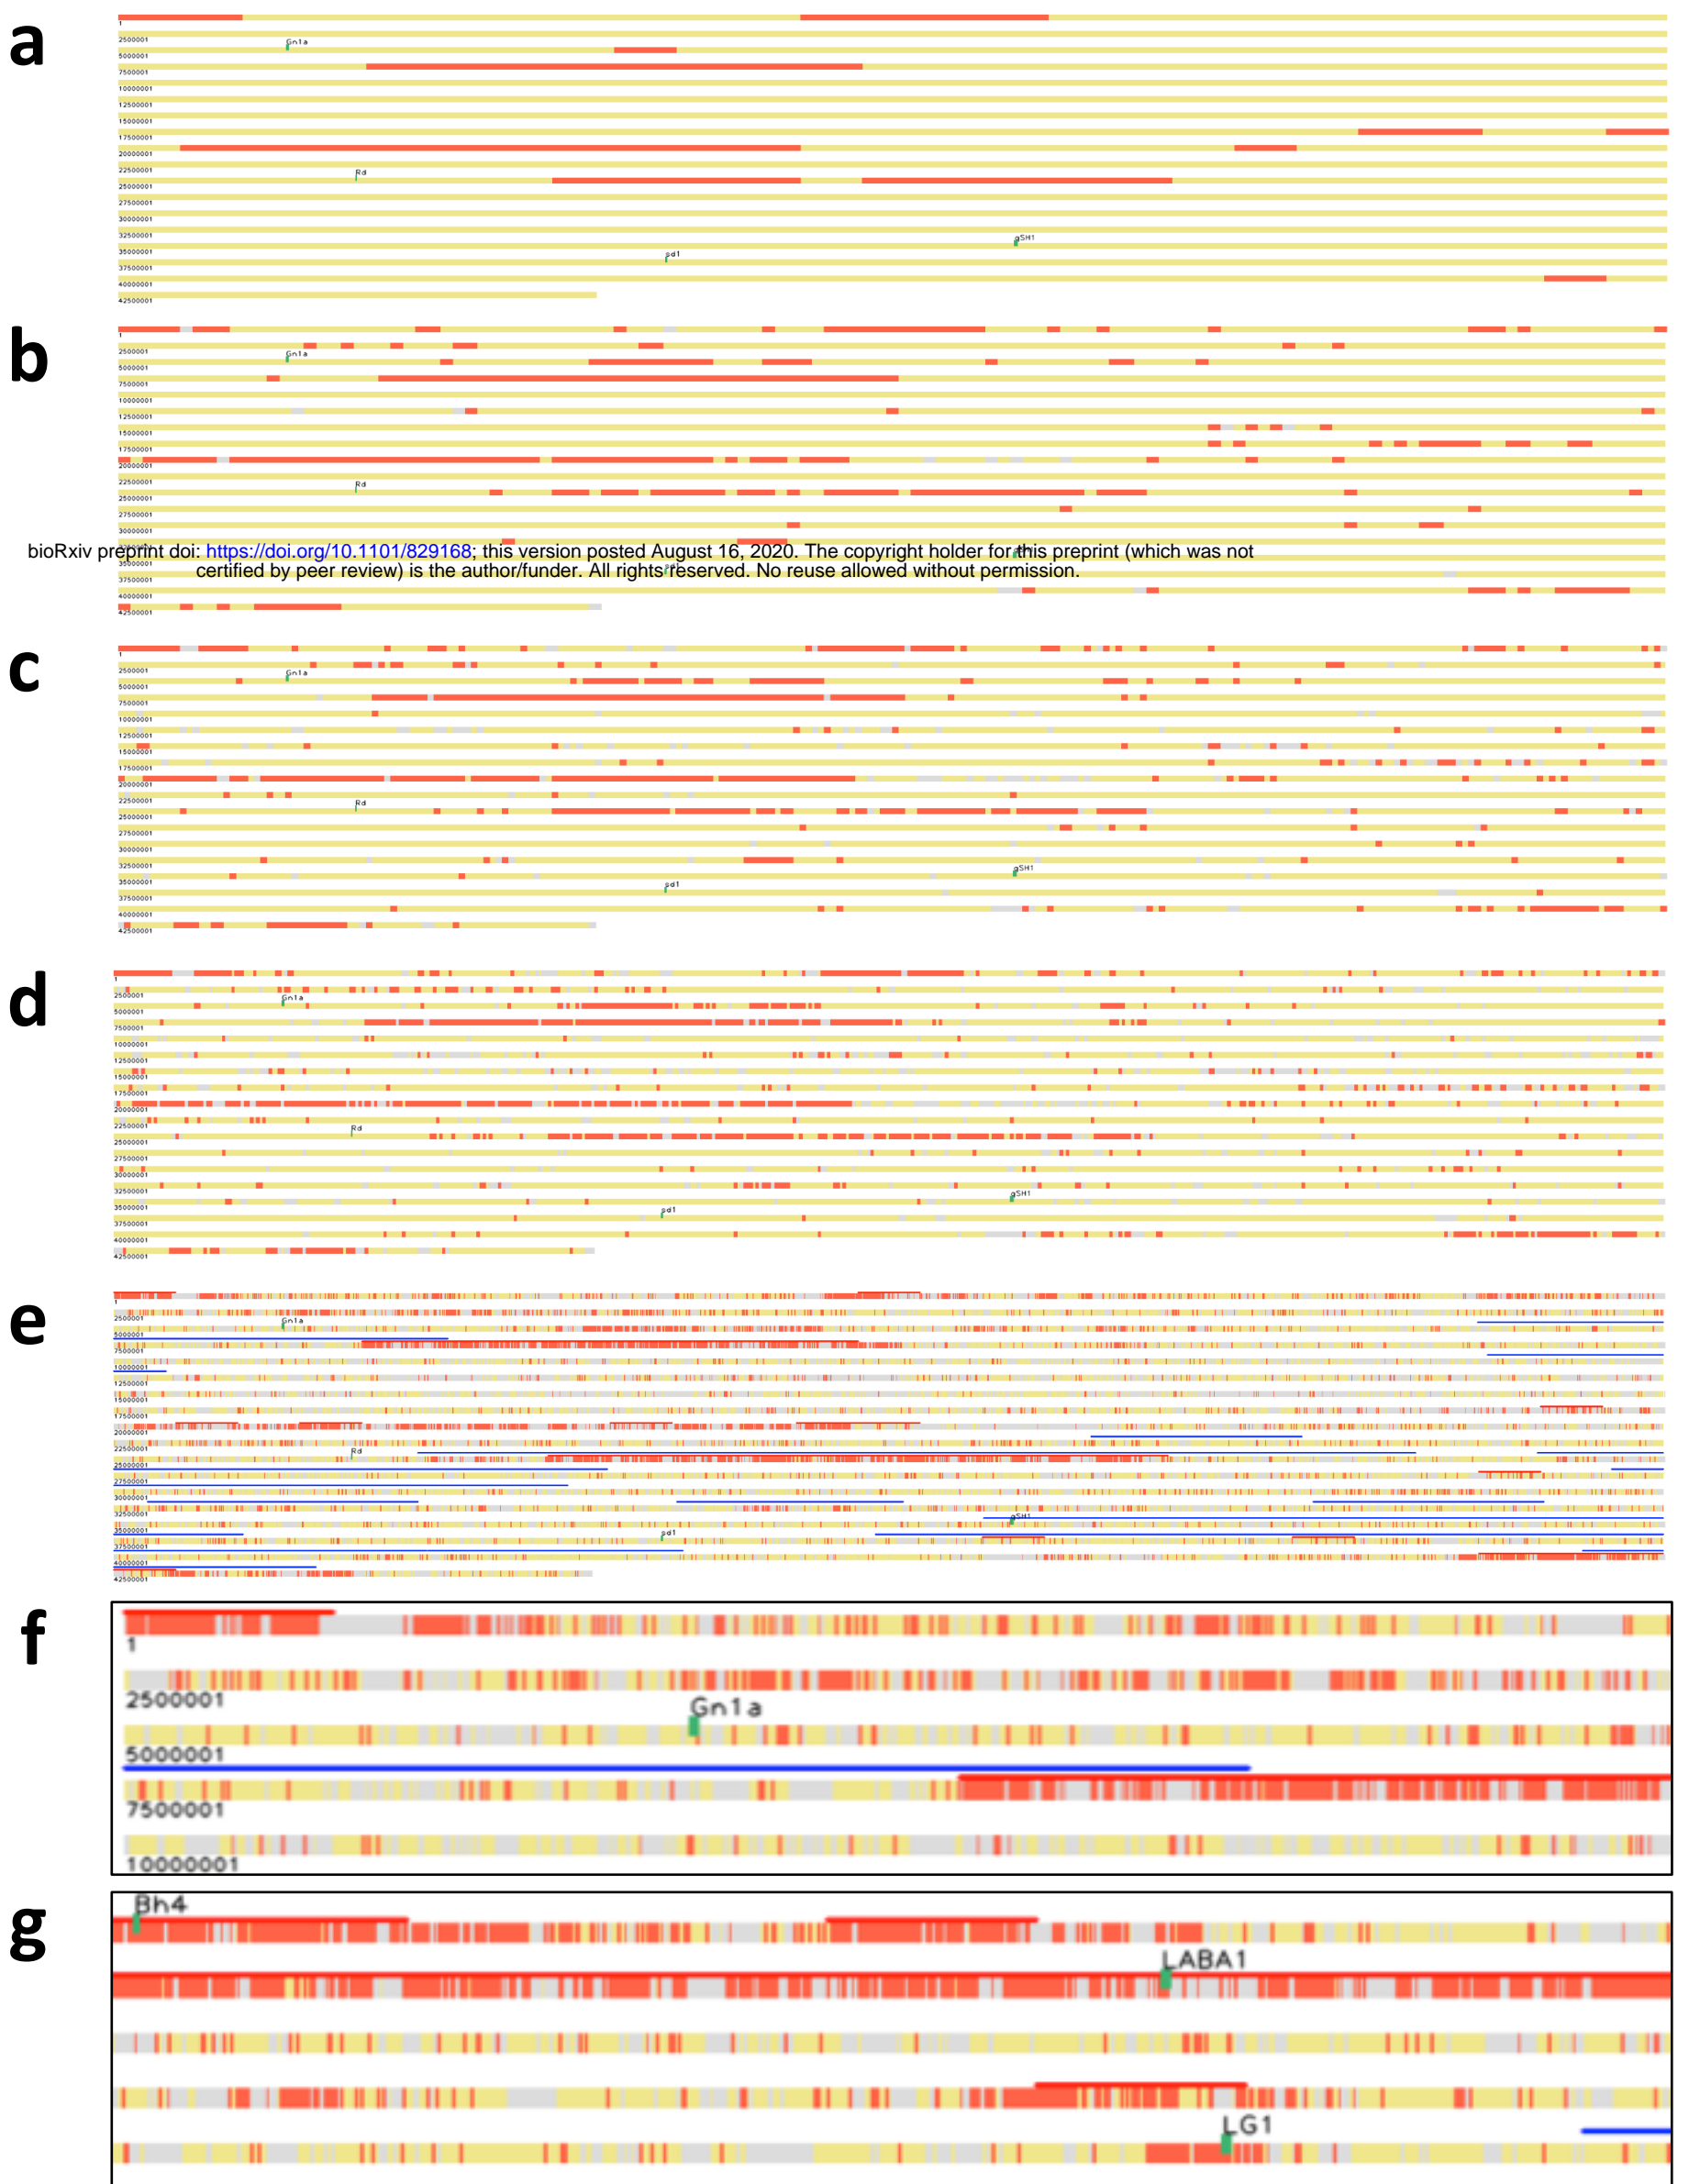

**Fig. 3.** 100kb- (a), 20kb- (b), 10kb- (c), 5kb- (d), and 1kb-resolution (e) IR maps (showing chromosome 1 only). The chromosome coordinate was shown in bp on the left side of horizontal chromosomal rectangles, lined in every 2,500,000 bp. Introgressive windows were shown in red. Non-introgressive windows were shown in yellow. Windows of undetermined phylogeny were shown in gray. Each green rectangle stands for a D-gene region. The 1kb-resolution windows (e) were shown in parallel with SSRs (red lines) and CDRGs (blue lines). Magnified views for two regions in chr01 (f) and chr04 (g) were exemplified as well.

**a**

all chromosomes

|                                    | counts  | counts (%) | outgroup to <i>indica</i><br>(F84 distance) | outgroup to <i>japonica</i><br>(F84 distance) | <i>DD</i> |
|------------------------------------|---------|------------|---------------------------------------------|-----------------------------------------------|-----------|
| overall windows                    | 373,204 | 100        |                                             |                                               |           |
| phylogeny N.D. windows             | 133,623 | 35.8       |                                             |                                               |           |
| phylogeny determined windows       | 239,581 | 64.2       | 0.055106967                                 | 0.053881707                                   | 1.23E-03  |
| non-introgressive windows          | 186,567 | 50.0       | 0.055653817                                 | 0.053942041                                   | 1.71E-03  |
| introgressive windows (all)        | 53,014  | 14.2       | 0.05318249                                  | 0.05366938                                    | 4.87E-04  |
| introgressive windows (narrow = 1) | 18,814  | 5.04       | 0.052480345                                 | 0.053064024                                   | 5.84E-04  |
| introgressive windows (wide >= 40) | 334     | 0.0895     | 0.055056613                                 | 0.055050718                                   | 5.89E-06  |

bioRxiv preprint doi: <https://doi.org/10.1101/829168>; this version posted August 16, 2020. The copyright holder for this preprint (which was not certified by peer review) is the author/funder. All rights reserved. No reuse allowed without permission.

**b**

Frequency

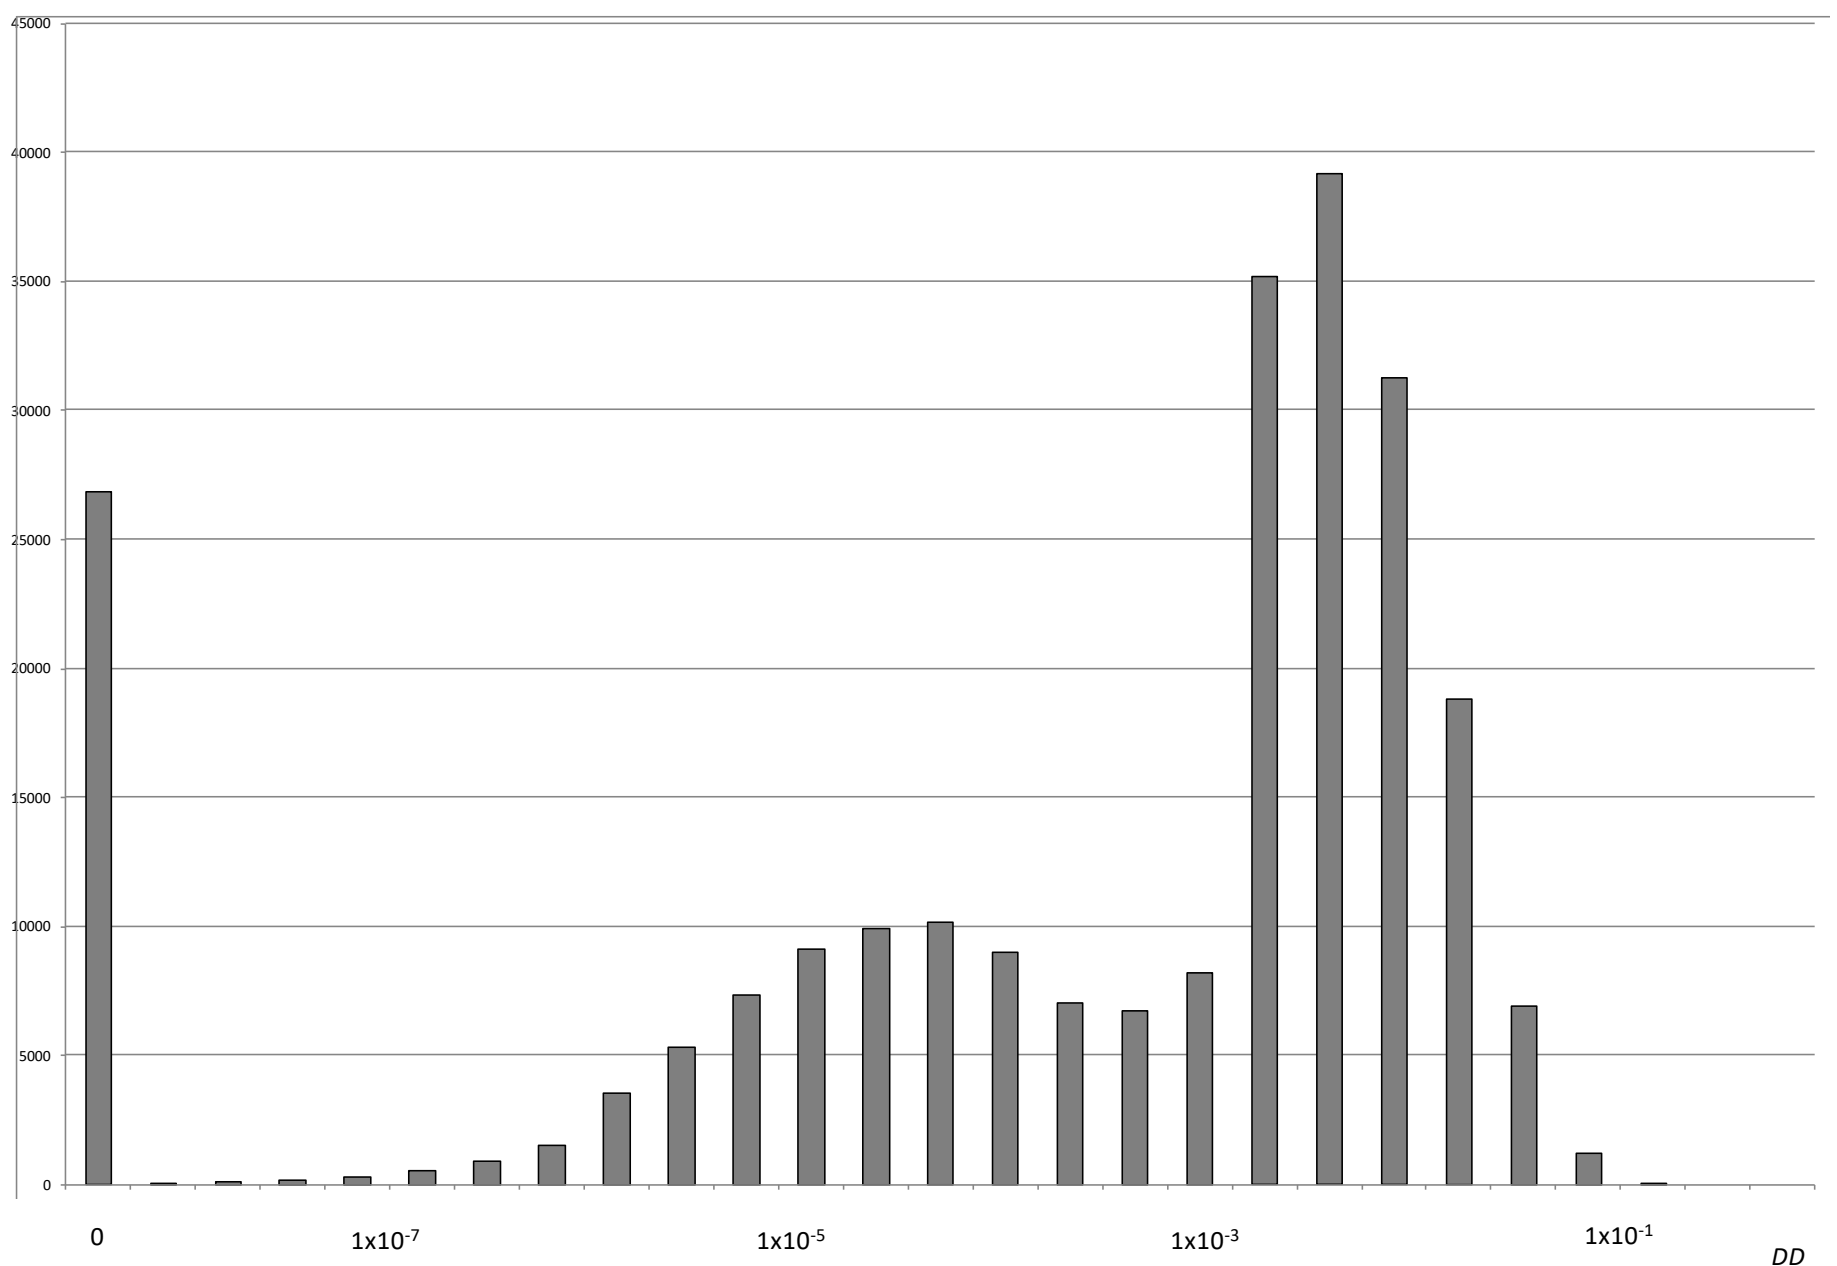

**Fig. 4.** Numerical distribution of *DD* (Distance Difference). The *DD* statistics according to dimensional continuity of all 1kb windows (**a**, average of all 12 chromosomes) and the window proportion histogram of particular *DD*s (**b**, x-axis : *DD* in logarithmic scale, y-axis : frequency of windows). *DD* is defined as below:

$$DD = | F84 (\text{outgroup to } indica) - F84 (\text{outgroup to } japonica) |$$

(\*) F84 = Felsenstein 84 nucleotide genetic distance

For more details of the formula, see **Methods**.

# Non-IRs

bioRxiv preprint doi: <https://doi.org/10.1101/829168>; this version posted August 16, 2020. The copyright holder for this preprint (which was not certified by peer review) is the author/funder. All rights reserved. No reuse allowed without permission.

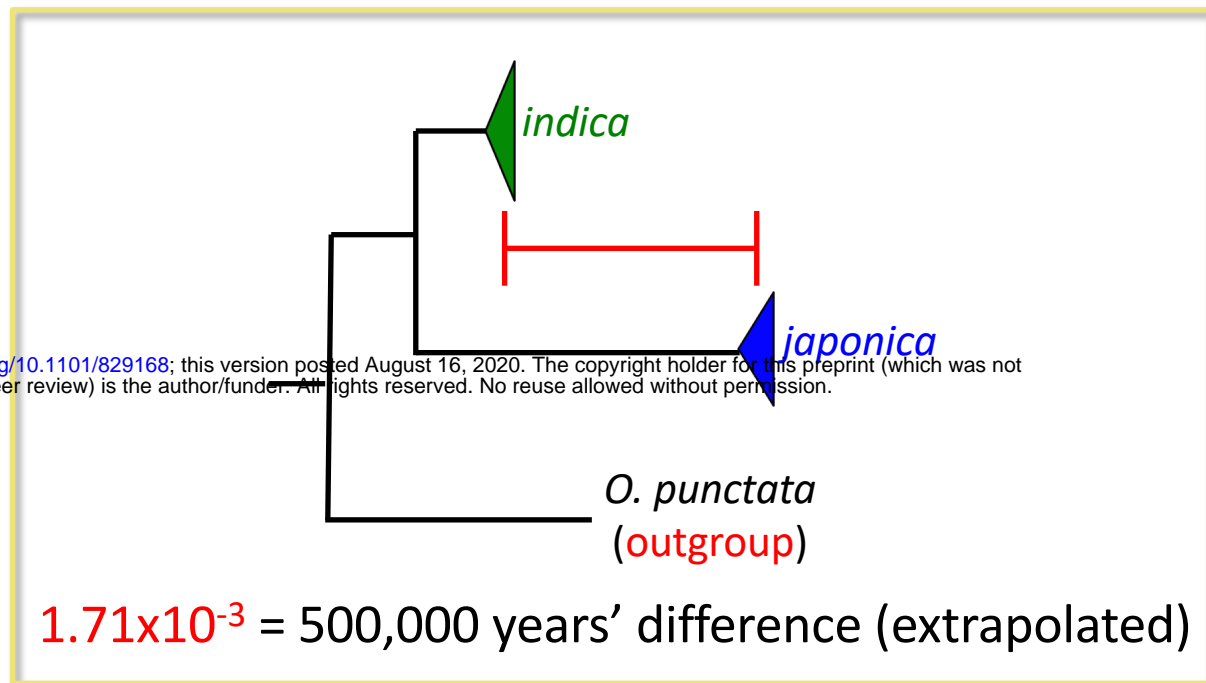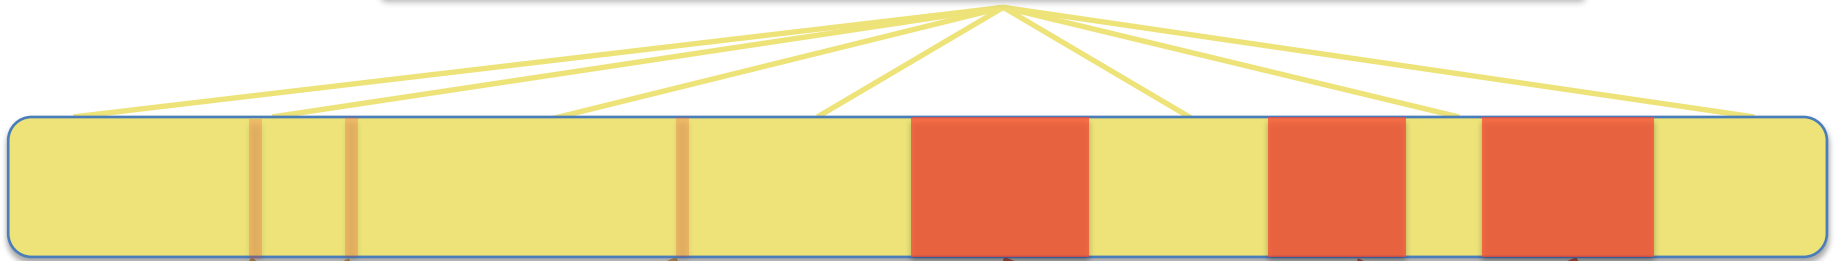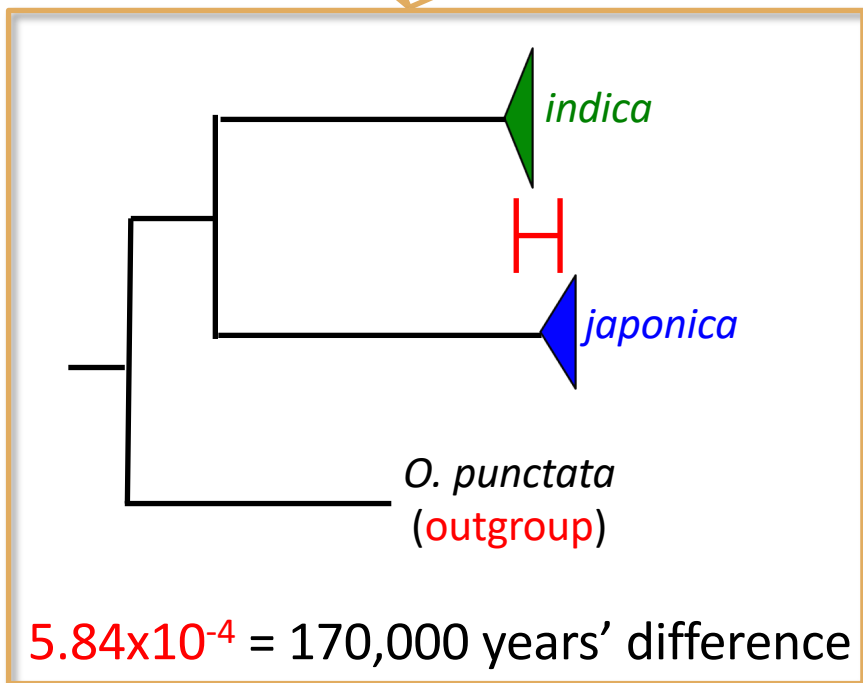

## Narrow IRs

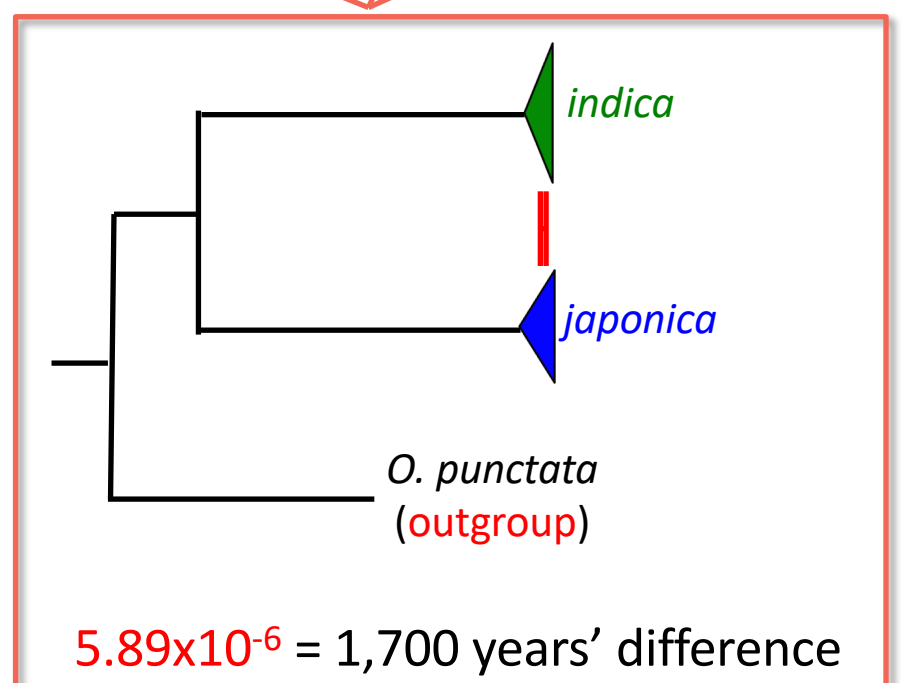

## Wide IRs

**Fig. 5.** Conceptual diagram of estimated introgression ages. The magnitudes of *DDs* (Distance Differences, red scales) were overdrawn.

*past*

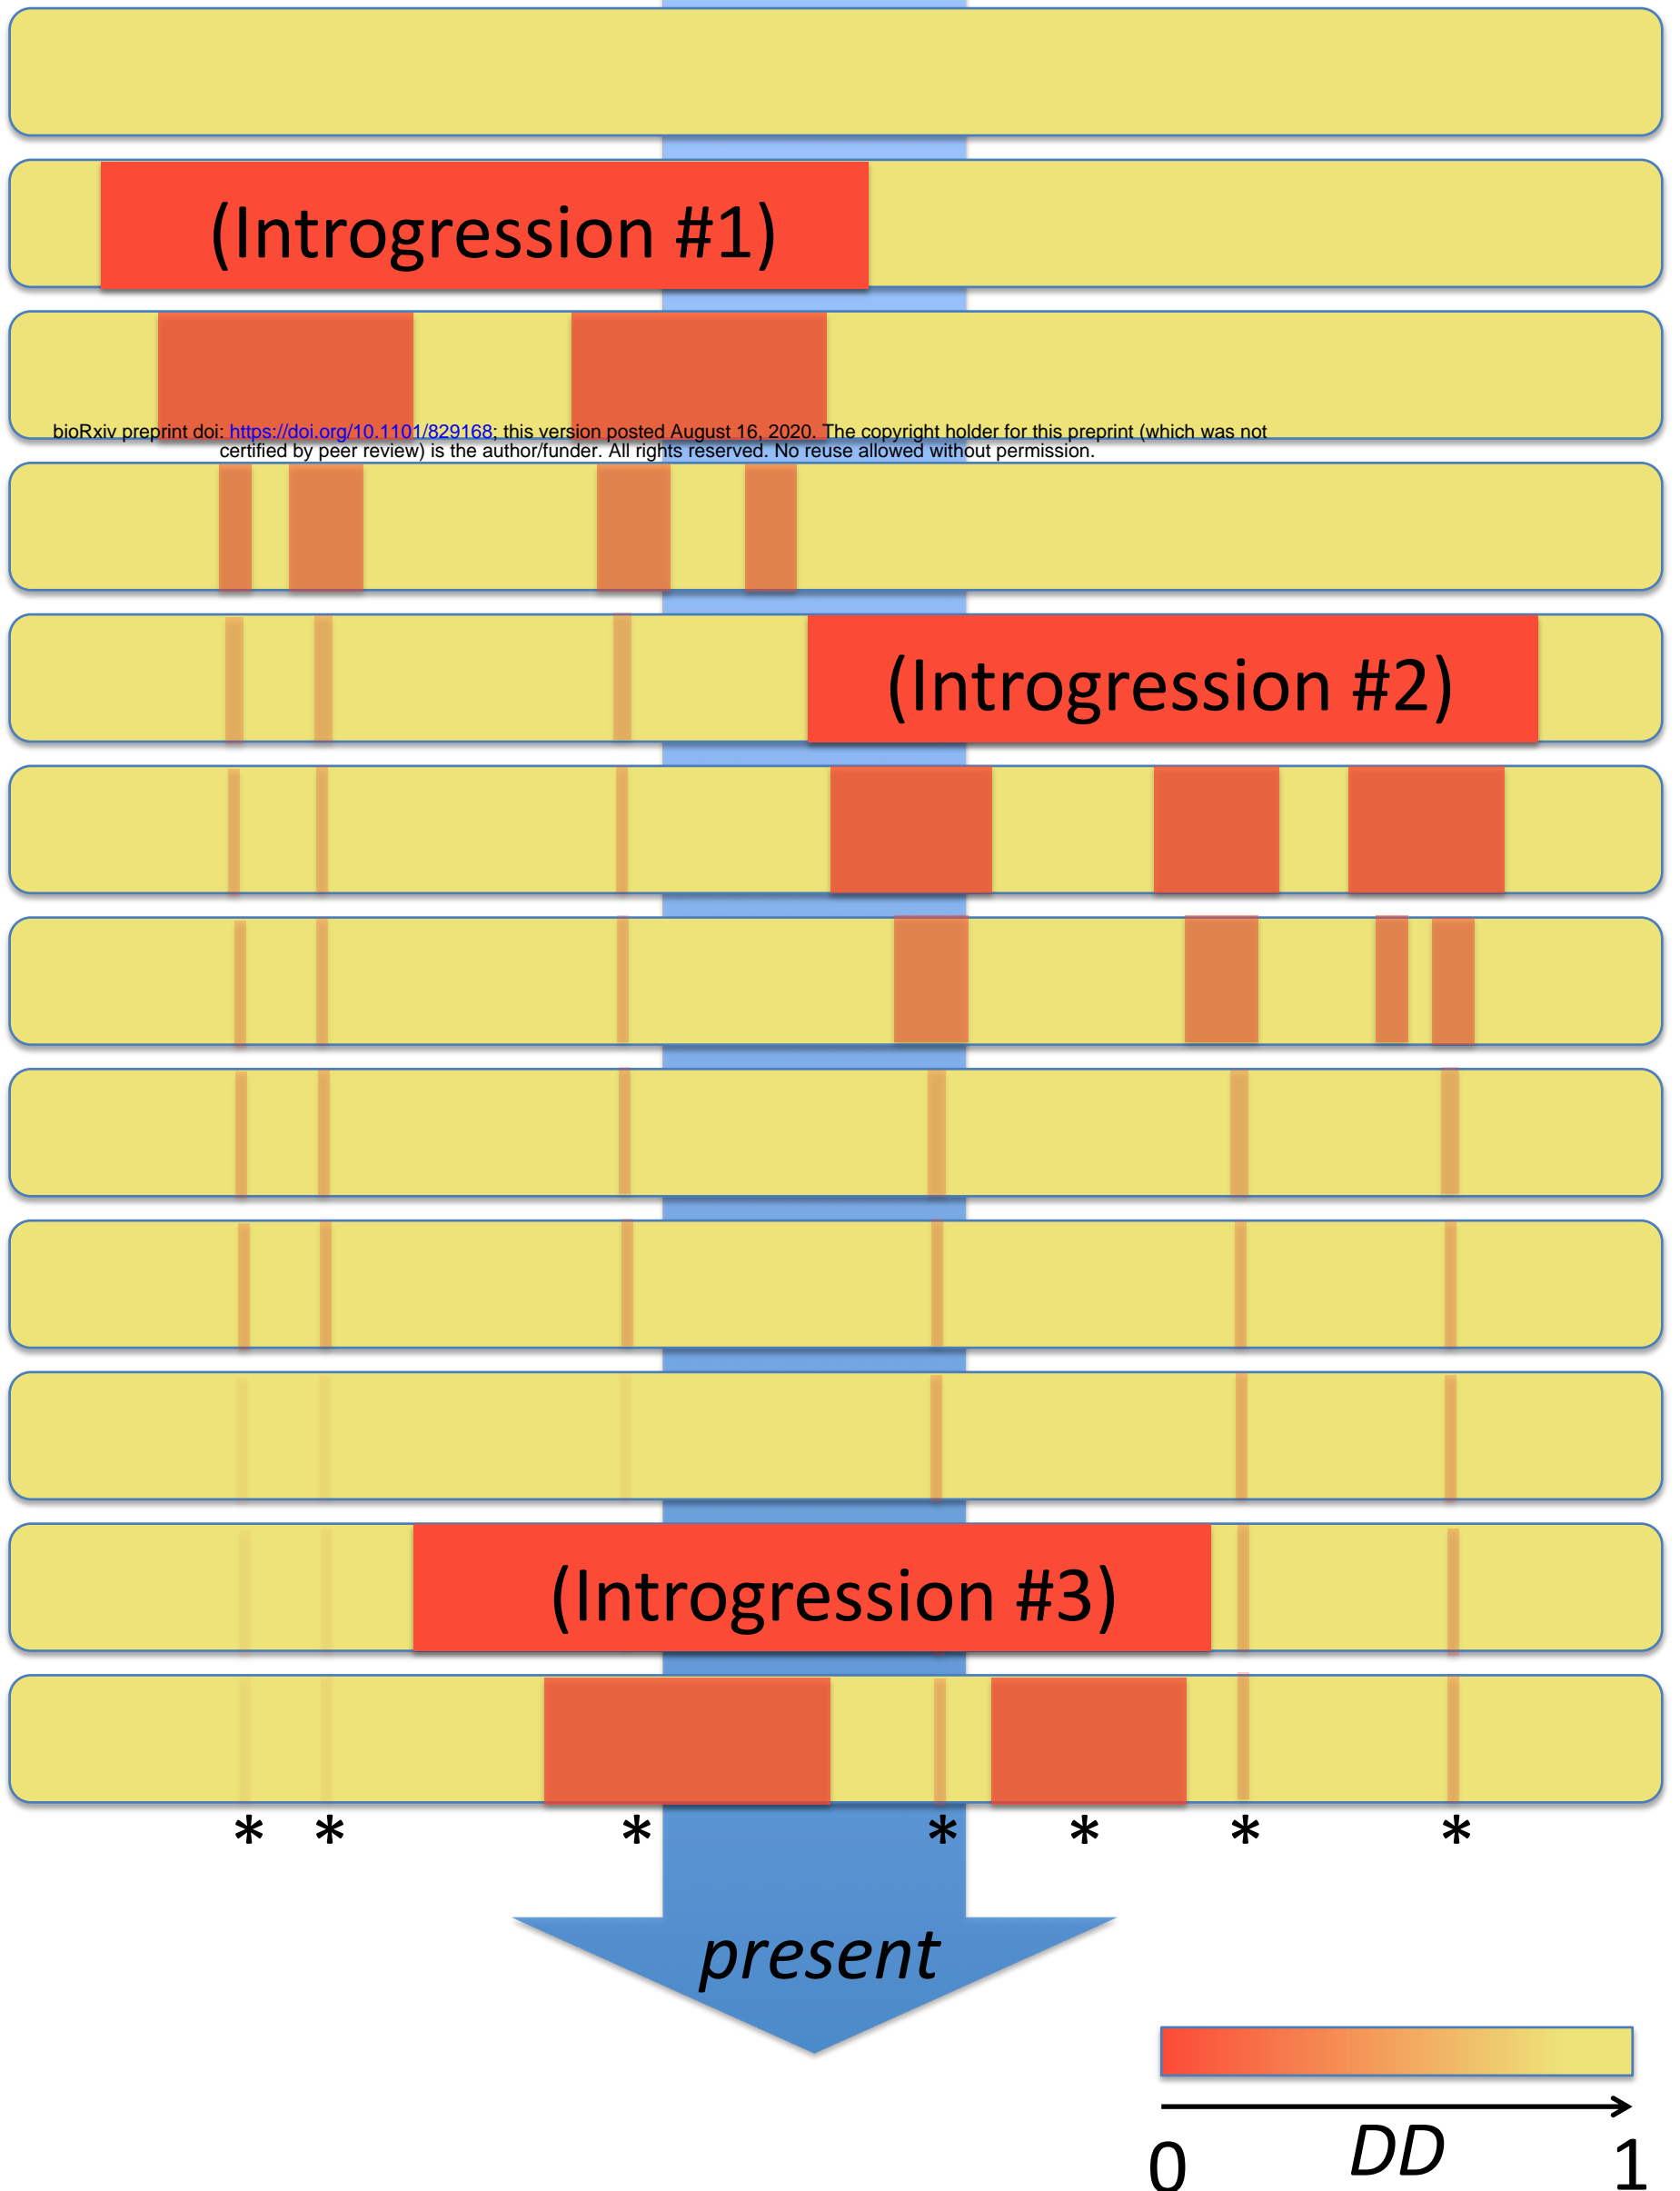

**Fig. 6.** The Sandcastles Model in domestication, a case scenario with three independent introgression events. Each \* (asterisk) stands for an agronomically beneficial allele.
